# Supplementary material for: What cervical screening is appropriate for women who have been vaccinated against high risk HPV? A simulation study
Source: PubMed Central journal article supplement (PMC5765470; doi:10.1002/ijc.31094), 2017-11-10
Supplement: IJC-142-709-s003.pdf [file IJC-142-709-s003.pdf]

**Table S1: Number of screens, cancers, reduction in cancer incidence and incremental benefit (the reduction in cancer incidence per additional screen) for 100% screening coverage, for each combination of vaccination and screening scenario, from 10,000 simulated datasets of 300,000 women with natural history parameters drawn from the distributions given in Figure 1**

| Vaccine     | Screening scenario*             | Number of screens<br>Mean (sd) | Number of cancers (per cohort of 300,000) |              | Cancers prevented |              |         |         | Incremental benefit |              |
|-------------|---------------------------------|--------------------------------|-------------------------------------------|--------------|-------------------|--------------|---------|---------|---------------------|--------------|
|             |                                 |                                | Mean                                      | 95% CR       | %                 | 95% CR       | Minimum | Maximum | %                   | 95% CR       |
| None        | None                            |                                | 6576                                      | (5002, 8060) |                   |              |         |         |                     |              |
|             | <u>HPV primary testing</u>      |                                |                                           |              |                   |              |         |         |                     |              |
|             | 3/5-yearly                      | 12.7 (0.0)                     | 592                                       | (481, 703)   | 90.9              | (88.9, 92.5) | 86.9    | 93.7    | 0.8                 | (0.6, 1.0)   |
|             | 6/10-yearly                     | 7.5 (0.0)                      | 868                                       | (713, 1018)  | 86.7              | (84.0, 88.8) | 81.0    | 90.6    | 2.6                 | (2.2, 3.1)   |
|             | 30, 40, 50, 65                  | 4.4 (0.0)                      | 1411                                      | (1149, 1654) | 78.4              | (74.8, 81.1) | 71.0    | 83.5    | 3.0                 | (2.0, 4.1)   |
|             | 30, 40, 55                      | 3.4 (0.0)                      | 1605                                      | (1305, 1877) | 75.5              | (71.5, 78.5) | 66.9    | 81.2    | 22.2                | (21.0, 23.3) |
|             | <u>Cytology primary testing</u> |                                |                                           |              |                   |              |         |         |                     |              |
|             | 3/5-yearly                      | 12.0 (0.0)                     | 864                                       | (709, 1016)  | 86.5              | (83.8, 88.7) | 81.2    | 90.1    | 1.6                 | (1.3, 1.8)   |
| 6/10-yearly | 7.0 (0.0)                       | 1369                           | (1126, 1595)                              | 78.7         | (75.2, 81.6)      | 70.5         | 84.2    | 11.2    | (10.7, 11.7)        |              |
| I           | None                            |                                | 1949                                      | (1419, 2526) | 70.3              | (65.1, 75.5) | 62.7    | 77.6    |                     |              |
|             | 3/5-yearly                      | 12.3 (0.0)                     | 195                                       | (145, 252)   | 97.0              | (96.0, 97.8) | 95.2    | 98.2    | 0.3                 | (0.2, 0.4)   |
|             | 6/10-yearly                     | 7.3 (0.0)                      | 280                                       | (212, 358)   | 95.7              | (94.4, 96.8) | 93.4    | 97.5    | 0.8                 | (0.5, 1.0)   |
|             | 30, 40, 50, 65                  | 4.2 (0.0)                      | 433                                       | (330, 549)   | 93.4              | (91.6, 94.8) | 90.3    | 95.7    | 1.0                 | (0.4, 1.6)   |
|             | 25, 35, 50, 65                  | 4.3 (0.0)                      | 467                                       | (353, 591)   | 92.8              | (90.9, 94.5) | 89.9    | 95.6    | 0.4                 | (-0.2, 1.1)  |
|             | 30, 40, 55                      | 3.2 (0.0)                      | 499                                       | (377, 634)   | 92.4              | (90.5, 94.0) | 89.0    | 95.0    | 2.7                 | (1.9, 3.5)   |
|             | 30, 45, 60                      | 3.2 (0.0)                      | 557                                       | (422, 707)   | 91.5              | (89.4, 93.3) | 88.1    | 94.5    | 1.9                 | (1.2, 2.6)   |
|             | 25, 45, 65                      | 3.2 (0.0)                      | 704                                       | (532, 896)   | 89.2              | (86.7, 91.4) | 85.0    | 92.6    | -0.4                | (-1.2, 0.4)  |
|             | 30, 45                          | 2.2 (0.0)                      | 682                                       | (510, 868)   | 89.6              | (87.3, 91.7) | 85.6    | 92.8    | 3.9                 | (2.9, 5.0)   |
|             | 30, 55                          | 2.2 (0.0)                      | 752                                       | (565, 959)   | 88.5              | (85.9, 90.9) | 84.4    | 92.3    | 2.9                 | (1.9, 4.0)   |
|             | 35                              | 1.1 (0.0)                      | 959                                       | (718, 1221)  | 85.4              | (82.3, 88.2) | 80.1    | 89.6    | 14.0                | (11.3, 16.8) |
|             | 40                              | 1.1 (0.0)                      | 1005                                      | (756, 1272)  | 84.7              | (81.5, 87.5) | 78.8    | 89.1    | 13.6                | (10.8, 16.4) |
|             | 30                              | 1.1 (0.0)                      | 1019                                      | (753, 1313)  | 84.4              | (81.3, 87.4) | 79.2    | 89.2    | 12.4                | (10.0, 15.0) |
|             | 45                              | 1.0 (0.0)                      | 1168                                      | (878, 1478)  | 82.2              | (78.7, 85.5) | 76.5    | 87.2    | 11.5                | (9.1, 14.1)  |
|             | None                            |                                | 1706                                      | (1232, 2217) | 74.0              | (69.5, 78.6) | 67.3    | 80.4    |                     |              |
|             | 3/5-yearly                      | 12.3 (0.0)                     | 157                                       | (116, 203)   | 97.6              | (96.9, 98.2) | 95.7    | 98.5    | 0.2                 | (0.1, 0.3)   |
|             | 6/10-yearly                     | 7.2 (0.0)                      | 228                                       | (169, 293)   | 96.5              | (95.5, 97.3) | 94.3    | 97.9    | 0.7                 | (0.5, 1.0)   |
|             | 30, 40, 50, 65                  | 4.2 (0.0)                      | 375                                       | (283, 476)   | 94.3              | (92.8, 95.6) | 91.0    | 96.5    | 0.8                 | (0.3, 1.4)   |

|     |                |            |             |              |              |              |      |      |             |              |
|-----|----------------|------------|-------------|--------------|--------------|--------------|------|------|-------------|--------------|
| II  | 25, 35, 50, 65 | 4.3 (0.0)  | 387         | (290, 494)   | 94.1         | (92.5, 95.5) | 91.0 | 96.3 | 0.6         | (0.0, 1.2)   |
|     | 30, 40, 55     | 3.2 (0.0)  | 428         | (321, 547)   | 93.4         | (91.8, 95.0) | 90.5 | 95.9 | 2.1         | (1.4, 2.9)   |
|     | 30, 45, 60     | 3.1 (0.0)  | 472         | (352, 606)   | 92.8         | (90.9, 94.4) | 89.4 | 95.6 | 1.5         | (0.9, 2.2)   |
|     | 25, 45, 65     | 3.1 (0.0)  | 608         | (450, 781)   | 90.7         | (88.6, 92.7) | 86.9 | 93.8 | -0.5        | (-1.2, 0.2)  |
|     | 30, 45         | 2.1 (0.0)  | 572         | (427, 732)   | 91.3         | (89.1, 93.2) | 87.2 | 94.2 | 3.5         | (2.6, 4.5)   |
|     | 30, 55         | 2.1 (0.0)  | 634         | (477, 816)   | 90.3         | (88.1, 92.4) | 86.1 | 93.5 | 2.6         | (1.7, 3.6)   |
|     | 35             | 1.1 (0.0)  | 818         | (612, 1047)  | 87.5         | (84.9, 90.1) | 83.0 | 91.5 | 12.7        | (10.1, 15.2) |
|     | 40             | 1.0 (0.0)  | 873         | (654, 1109)  | 86.7         | (83.8, 89.5) | 82.2 | 91.0 | 12.1        | (9.6, 14.6)  |
|     | 30             | 1.1 (0.0)  | 865         | (642, 1117)  | 86.8         | (84.0, 89.5) | 81.9 | 91.2 | 11.4        | (9.1, 13.7)  |
| 45  | 1.0 (0.0)      | 1018       | (749, 1302) | 84.5         | (81.3, 87.6) | 79.6         | 89.3 | 10.2 | (8.1, 12.4) |              |
| III | None           |            | 1552        | (1124, 2022) | 76.4         | (72.2, 80.6) | 70.3 | 82.1 |             |              |
|     | 3/5-yearly     | 12.3 (0.0) | 153         | (111, 198)   | 97.7         | (97.1, 98.2) | 96.3 | 98.6 | 0.2         | (0.1, 0.3)   |
|     | 6/10-yearly    | 7.2 (0.0)  | 220         | (163, 281)   | 96.6         | (95.8, 97.4) | 95.1 | 97.8 | 0.6         | (0.4, 0.8)   |
|     | 30, 40, 50, 65 | 4.1 (0.0)  | 346         | (261, 437)   | 94.7         | (93.4, 95.8) | 92.5 | 96.4 | 0.8         | (0.3, 1.3)   |
|     | 25, 35, 50, 65 | 4.2 (0.0)  | 366         | (271, 468)   | 94.4         | (93.2, 95.6) | 92.3 | 96.3 | 0.4         | (-0.1, 1.0)  |
|     | 30, 40, 55     | 3.2 (0.0)  | 395         | (299, 500)   | 94.0         | (92.5, 95.2) | 91.4 | 96.0 | 2.2         | (1.5, 2.9)   |
|     | 30, 45, 60     | 3.1 (0.0)  | 438         | (330, 556)   | 93.3         | (91.8, 94.7) | 90.6 | 95.4 | 1.6         | (1.0, 2.3)   |
|     | 25, 45, 65     | 3.1 (0.0)  | 571         | (423, 732)   | 91.3         | (89.4, 93.1) | 88.2 | 94.0 | -0.4        | (-1.2, 0.3)  |
|     | 30, 45         | 2.1 (0.0)  | 544         | (407, 692)   | 91.7         | (89.9, 93.4) | 88.5 | 94.2 | 3.1         | (2.2, 4.0)   |
|     | 30, 55         | 2.1 (0.0)  | 597         | (446, 761)   | 90.9         | (89.0, 92.7) | 87.6 | 93.6 | 2.3         | (1.5, 3.2)   |
|     | 35             | 1.1 (0.0)  | 761         | (558, 980)   | 88.4         | (86.1, 90.6) | 84.8 | 91.7 | 11.4        | (9.1, 13.6)  |
|     | 40             | 1.0 (0.0)  | 790         | (589, 1011)  | 87.9         | (85.6, 90.2) | 83.9 | 91.5 | 11.1        | (8.9, 13.4)  |
|     | 30             | 1.1 (0.0)  | 815         | (597, 1048)  | 87.6         | (85.2, 89.9) | 83.6 | 91.1 | 10.1        | (8.1, 12.2)  |
| 45  | 1.0 (0.0)      | 926        | (692, 1179) | 85.9         | (83.1, 88.5) | 81.2         | 90.1 | 9.3  | (7.3, 11.3) |              |
| IV  | None           |            | 2244        | (1690, 2846) | 65.8         | (60.8, 70.8) | 57.9 | 73.2 |             |              |
|     | 3/5-yearly     | 12.3 (0.0) | 229         | (179, 284)   | 96.5         | (95.4, 97.3) | 94.5 | 97.9 | 0.3         | (0.2, 0.4)   |
|     | 6/10-yearly    | 7.3 (0.0)  | 325         | (255, 400)   | 95.0         | (93.6, 96.2) | 92.4 | 97.0 | 0.9         | (0.7, 1.2)   |
|     | 30, 40, 50, 65 | 4.2 (0.0)  | 514         | (407, 632)   | 92.1         | (90.1, 93.9) | 88.7 | 95.0 | 1.3         | (0.7, 2.0)   |
|     | 25, 35, 50, 65 | 4.3 (0.0)  | 538         | (423, 664)   | 91.8         | (89.7, 93.4) | 88.3 | 94.6 | 0.8         | (0.2, 1.5)   |
|     | 30, 40, 55     | 3.2 (0.0)  | 599         | (472, 737)   | 90.8         | (88.6, 92.8) | 86.8 | 93.9 | 3.2         | (2.4, 4.0)   |
|     | 30, 45, 60     | 3.2 (0.0)  | 649         | (508, 796)   | 90.1         | (87.8, 92.1) | 86.1 | 93.2 | 2.5         | (1.8, 3.4)   |
|     | 25, 45, 65     | 3.2 (0.0)  | 830         | (648, 1023)  | 87.3         | (84.6, 89.7) | 82.6 | 90.9 | -0.2        | (-1.0, 0.6)  |
|     | 30, 45         | 2.2 (0.0)  | 817         | (645, 1002)  | 87.5         | (84.8, 89.8) | 82.6 | 91.1 | 4.3         | (3.3, 5.4)   |

|   |                |            |      |              |      |              |      |      |      |              |
|---|----------------|------------|------|--------------|------|--------------|------|------|------|--------------|
|   | 30, 55         | 2.2 (0.0)  | 876  | (687, 1085)  | 86.6 | (83.7, 89.1) | 81.5 | 90.5 | 3.5  | (2.5, 4.6)   |
|   | 35             | 1.1 (0.0)  | 1128 | (871, 1399)  | 82.8 | (79.5, 85.7) | 77.4 | 87.3 | 15.8 | (13.1, 18.4) |
|   | 40             | 1.1 (0.0)  | 1185 | (923, 1454)  | 81.9 | (78.5, 85.0) | 75.9 | 86.7 | 15.2 | (12.5, 17.9) |
|   | 30             | 1.2 (0.0)  | 1204 | (926, 1503)  | 81.6 | (78.2, 84.7) | 75.9 | 86.6 | 13.7 | (11.4, 16.2) |
|   | 45             | 1.0 (0.0)  | 1366 | (1065, 1674) | 79.1 | (75.3, 82.6) | 72.7 | 84.6 | 12.9 | (10.5, 15.4) |
| V | None           |            | 765  | (556, 1017)  | 88.4 | (86.1, 90.5) | 85.1 | 91.9 |      |              |
|   | 3/5-yearly     | 12.1 (0.0) | 78   | (53, 106)    | 98.8 | (98.3, 99.2) | 97.9 | 99.5 | 0.1  | (0.0, 0.2)   |
|   | 6/10-yearly    | 7.1 (0.0)  | 112  | (80, 150)    | 98.3 | (97.6, 98.8) | 97.2 | 99.1 | 0.3  | (0.2, 0.5)   |
|   | 30, 40, 50, 65 | 4.1 (0.0)  | 176  | (129, 229)   | 97.3 | (96.5, 98.0) | 95.7 | 98.4 | 0.4  | (0.0, 0.7)   |
|   | 25, 35, 50, 65 | 4.1 (0.0)  | 183  | (133, 243)   | 97.2 | (96.3, 97.9) | 95.4 | 98.4 | 0.2  | (-0.1, 1.0)  |
|   | 30, 40, 55     | 3.1 (0.0)  | 199  | (147, 259)   | 97.0 | (96.1, 97.7) | 95.3 | 98.2 | 1.0  | (0.6, 1.5)   |
|   | 30, 45, 60     | 3.1 (0.0)  | 221  | (163, 288)   | 96.6 | (95.7, 97.4) | 95.0 | 98.0 | 0.7  | (0.3, 1.1)   |
|   | 25, 45, 65     | 3.1 (0.0)  | 276  | (200, 365)   | 95.8 | (94.6, 96.8) | 93.6 | 97.4 | -0.1 | (-0.6, 0.3)  |
|   | 30, 45         | 2.1 (0.0)  | 268  | (198, 349)   | 95.9 | (94.8, 96.9) | 94.1 | 97.4 | 1.6  | (1.0, 2.1)   |
|   | 30, 55         | 2.1 (0.0)  | 298  | (221, 389)   | 95.4 | (94.3, 96.5) | 93.4 | 97.1 | 1.1  | (0.6, 1.7)   |
|   | 35             | 1.0 (0.0)  | 373  | (276, 488)   | 94.3 | (93.0, 95.5) | 92.1 | 96.2 | 5.8  | (4.6, 7.1)   |
|   | 40             | 1.0 (0.0)  | 390  | (291, 505)   | 94.0 | (92.6, 95.3) | 91.4 | 96.0 | 5.6  | (4.3, 6.9)   |
|   | 30             | 1.1 (0.0)  | 397  | (290, 526)   | 94.0 | (92.6, 95.2) | 91.6 | 95.9 | 5.3  | (4.2, 6.5)   |
|   | 45             | 1.0 (0.0)  | 459  | (341, 597)   | 93.0 | (91.3, 94.5) | 90.3 | 95.4 | 4.6  | (3.5, 5.7)   |

Central Range, the 2.5th and 97.5th percentiles

Vaccine I: 100% efficacy against HPV16/18, no cross protection or waning efficacy

Vaccine II: 100% efficacy against HPV16/18, cross protection for the quadrivalent vaccine, preventing 14.7% of other high risk HPV infections

Vaccine III: 100% efficacy against HPV16/18, cross protection for the bivalent vaccine, preventing 22.1% of other high risk HPV infections

Vaccine IV: 100% initial efficacy against HPV16/18, but efficacy wanes by 0.25% (absolute) every 6 months

Vaccine V: the nonavalent vaccine, providing 100% efficacy against HPV16/18 and preventing 63.6% of other high risk HPV infections

\*Screening scenarios provide screening ages, except 3/5 (6/10)-yearly represents screening every 3(6) years aged 25-49 years and every 5(10) years aged 50-64 years.

**Table S2: Number of screens, cancers, reduction in cancer incidence and incremental benefit (the reduction in cancer incidence per additional screen) for realistic screening coverage, for each combination of vaccination and screening scenario, from 10,000 simulated datasets of 300,000 women with natural history parameters drawn from the distributions given in Figure 1**

| Vaccine     | Screening scenario*             | Number of screens<br>Mean (sd) | Number of cancers (per cohort of 300,000) |              | Cancers prevented |              |         |         | Incremental benefit |              |
|-------------|---------------------------------|--------------------------------|-------------------------------------------|--------------|-------------------|--------------|---------|---------|---------------------|--------------|
|             |                                 |                                | Mean                                      | 95% CR       | %                 | 95% CR       | Minimum | Maximum | %                   | 95% CR       |
| None        | None                            |                                | 6576                                      | (5002, 8060) |                   |              |         |         |                     |              |
|             | <u>HPV primary testing</u>      |                                |                                           |              |                   |              |         |         |                     |              |
|             | 3/5-yearly                      | 7.2 (0.0)                      | 1885                                      | (1501, 2241) | 71.2              | (68.7, 73.2) | 66.0    | 74.9    | 0.9                 | (0.3, 1.7)   |
|             | 6/10-yearly                     | 5.1 (0.0)                      | 2013                                      | (1604, 2387) | 69.3              | (66.5, 71.5) | 63.7    | 72.9    | 3.0                 | (2.2, 3.8)   |
|             | 30, 40, 50, 65                  | 3.2 (0.0)                      | 2375                                      | (1897, 2813) | 63.8              | (60.4, 66.4) | 57.4    | 69.2    | 3.1                 | (0.5, 5.8)   |
|             | 30, 40, 55                      | 2.7 (0.0)                      | 2484                                      | (1987, 2941) | 62.1              | (58.6, 64.9) | 54.5    | 67.4    | 23.1                | (21.8, 24.3) |
|             | <u>Cytology primary testing</u> |                                |                                           |              |                   |              |         |         |                     |              |
|             | 3/5-yearly                      | 6.6 (0.0)                      | 2298                                      | (1842, 2727) | 64.3              | (61.3, 66.8) | 56.9    | 68.4    | 2.0                 | (1.2, 2.8)   |
| 6/10-yearly | 4.6 (0.0)                       | 2554                           | (2043, 3026)                              | 60.3         | (57.0, 63.1)      | 53.5         | 65.4    | 13.1    | (12.4, 13.7)        |              |
| I           | None                            |                                | 1949                                      | (1419, 2526) | 70.3              | (65.1, 75.5) | 62.7    | 77.6    |                     |              |
|             | 3/5-yearly                      | 6.9 (0.0)                      | 591                                       | (441, 752)   | 91.0              | (89.1, 92.7) | 87.9    | 93.7    | 0.3                 | (-0.1, 0.7)  |
|             | 6/10-yearly                     | 4.8 (0.0)                      | 627                                       | (467, 799)   | 90.4              | (88.4, 92.3) | 87.2    | 93.4    | 0.9                 | (0.4, 1.4)   |
|             | 30, 40, 50, 65                  | 3.1 (0.0)                      | 726                                       | (545, 924)   | 88.9              | (86.6, 91.1) | 85.0    | 92.1    | 1.0                 | (-0.3, 2.5)  |
|             | 25, 35, 50, 65                  | 3.2 (0.0)                      | 748                                       | (559, 950)   | 88.6              | (86.1, 90.8) | 84.8    | 92.1    | 0.4                 | (-0.9, 1.6)  |
|             | 30, 40, 55                      | 2.5 (0.0)                      | 763                                       | (573, 972)   | 88.3              | (85.9, 90.6) | 84.3    | 91.8    | 2.8                 | (1.7, 3.9)   |
|             | 30, 45, 60                      | 2.4 (0.0)                      | 813                                       | (607, 1033)  | 87.6              | (85.1, 90.0) | 83.0    | 91.4    | 2.2                 | (1.0, 3.4)   |
|             | 25, 45, 65                      | 2.3 (0.0)                      | 935                                       | (697, 1196)  | 85.7              | (82.8, 88.4) | 81.2    | 89.6    | -0.4                | (-1.9, 1.0)  |
|             | 30, 45                          | 1.7 (0.0)                      | 920                                       | (684, 1173)  | 86.0              | (83.2, 88.6) | 81.5    | 90.2    | 3.9                 | (2.6, 5.2)   |
|             | 30, 55                          | 1.8 (0.0)                      | 948                                       | (709, 1211)  | 85.5              | (82.6, 88.3) | 80.8    | 90.0    | 2.8                 | (1.7, 4.0)   |
|             | 35                              | 0.9 (0.0)                      | 1112                                      | (827, 1419)  | 83.0              | (79.7, 86.1) | 77.6    | 87.4    | 13.8                | (11.1, 16.6) |
|             | 40                              | 0.9 (0.0)                      | 1165                                      | (871, 1482)  | 82.2              | (78.8, 85.4) | 76.7    | 87.3    | 12.6                | (10.4, 15.9) |
|             | 30                              | 1.0 (0.0)                      | 1147                                      | (848, 1474)  | 82.5              | (79.1, 85.7) | 77.3    | 87.4    | 13.1                | (10.0, 15.2) |
|             | 45                              | 0.9 (0.0)                      | 1307                                      | (977, 1658)  | 80.1              | (76.2, 83.7) | 74.1    | 85.6    | 10.9                | (8.6, 13.4)  |
|             | None                            |                                | 1706                                      | (1232, 2217) | 74.0              | (69.5, 78.6) | 67.3    | 80.4    |                     |              |
|             | 3/5-yearly                      | 6.8 (0.0)                      | 499                                       | (368, 640)   | 92.4              | (90.8, 93.9) | 89.4    | 94.8    | 0.2                 | (-0.1, 0.6)  |
|             | 6/10-yearly                     | 4.8 (0.0)                      | 532                                       | (394, 683)   | 91.9              | (90.2, 93.5) | 88.9    | 94.4    | 0.8                 | (0.4, 1.3)   |
|             | 30, 40, 50, 65                  | 3.1 (0.0)                      | 625                                       | (467, 798)   | 90.5              | (88.4, 92.4) | 87.1    | 93.4    | 0.8                 | (-0.5, 2.2)  |

|     |                |           |      |              |      |              |      |      |      |             |
|-----|----------------|-----------|------|--------------|------|--------------|------|------|------|-------------|
| II  | 25, 35, 50, 65 | 3.2 (0.0) | 636  | (473, 816)   | 90.3 | (88.2, 92.2) | 86.8 | 93.3 | 0.5  | (-0.7, 1.7) |
|     | 30, 40, 55     | 2.5 (0.0) | 656  | (486, 839)   | 90.0 | (87.8, 92.1) | 86.6 | 93.1 | 2.2  | (1.3, 3.3)  |
|     | 30, 45, 60     | 2.4 (0.0) | 695  | (516, 888)   | 89.4 | (87.1, 91.5) | 85.8 | 92.8 | 1.8  | (0.7, 2.9)  |
|     | 25, 45, 65     | 2.3 (0.0) | 803  | (594, 1035)  | 87.7 | (85.2, 90.2) | 83.6 | 91.4 | -0.5 | (-1.8, 0.8) |
|     | 30, 45         | 1.7 (0.0) | 782  | (579, 1005)  | 88.1 | (85.6, 90.5) | 83.8 | 91.9 | 3.5  | (2.3, 4.8)  |
|     | 30, 55         | 1.8 (0.0) | 808  | (600, 1039)  | 87.7 | (85.1, 90.1) | 83.7 | 91.4 | 2.5  | (1.5, 3.6)  |
|     | 35             | 0.9 (0.0) | 954  | (712, 1223)  | 85.4 | (82.6, 88.3) | 81.0 | 89.7 | 12.5 | (9.9, 15.0) |
|     | 40             | 0.9 (0.0) | 1012 | (753, 1290)  | 84.5 | (81.5, 87.5) | 80.0 | 89.3 | 11.5 | (9.3, 14.1) |
|     | 30             | 1.0 (0.0) | 980  | (727, 1264)  | 85.0 | (82.1, 88.0) | 80.4 | 89.4 | 11.7 | (9.2, 13.8) |
|     | 45             | 0.9 (0.0) | 1137 | (835, 1457)  | 82.7 | (79.3, 86.0) | 77.4 | 87.7 | 9.7  | (7.7, 11.9) |
| III | None           |           | 1552 | (1124, 2022) | 76.4 | (72.2, 80.6) | 70.3 | 82.1 |      |             |
|     | 3/5-yearly     | 6.8 (0.0) | 465  | (339, 597)   | 92.9 | (91.5, 94.3) | 90.8 | 95.1 | 0.2  | (-0.1, 0.6) |
|     | 6/10-yearly    | 4.8 (0.0) | 495  | (361, 636)   | 92.5 | (90.9, 93.9) | 89.9 | 94.9 | 0.7  | (0.3, 1.2)  |
|     | 30, 40, 50, 65 | 3.1 (0.0) | 575  | (428, 735)   | 91.2 | (89.4, 92.9) | 88.3 | 93.8 | 0.8  | (-0.5, 2.1) |
|     | 25, 35, 50, 65 | 3.2 (0.0) | 592  | (436, 760)   | 91.0 | (89.2, 92.7) | 88.1 | 93.6 | 0.3  | (-0.9, 1.4) |
|     | 30, 40, 55     | 2.5 (0.0) | 602  | (446, 773)   | 90.8 | (89.0, 92.6) | 87.5 | 93.5 | 2.3  | (1.3, 3.2)  |
|     | 30, 45, 60     | 2.4 (0.0) | 641  | (476, 820)   | 90.2 | (88.3, 92.1) | 86.9 | 92.9 | 1.8  | (0.8, 2.9)  |
|     | 25, 45, 65     | 2.3 (0.0) | 748  | (550, 961)   | 88.6 | (86.4, 90.8) | 85.0 | 92.0 | -0.5 | (-1.8, 0.8) |
|     | 30, 45         | 1.7 (0.0) | 729  | (540, 933)   | 88.9 | (86.7, 91.0) | 85.0 | 92.1 | 3.1  | (1.9, 4.3)  |
|     | 30, 55         | 1.8 (0.0) | 750  | (555, 961)   | 88.6 | (86.3, 90.7) | 85.2 | 91.9 | 2.3  | (1.3, 3.3)  |
|     | 35             | 0.9 (0.0) | 880  | (646, 1135)  | 86.6 | (84.1, 89.0) | 82.5 | 89.9 | 11.2 | (8.9, 13.5) |
|     | 40             | 0.9 (0.0) | 918  | (679, 1179)  | 86.0 | (83.4, 88.6) | 81.6 | 89.7 | 10.2 | (8.5, 13.0) |
|     | 30             | 1.0 (0.0) | 912  | (667, 1179)  | 86.1 | (83.5, 88.7) | 81.8 | 90.2 | 10.7 | (8.2, 12.4) |
|     | 45             | 0.9 (0.0) | 1034 | (767, 1323)  | 84.2 | (81.2, 87.1) | 79.2 | 88.7 | 8.9  | (7.0, 10.9) |
| IV  | None           |           | 2244 | (1690, 2846) | 65.8 | (60.8, 70.8) | 57.9 | 73.2 |      |             |
|     | 3/5-yearly     | 6.9 (0.0) | 688  | (536, 850)   | 89.5 | (87.5, 91.3) | 85.8 | 92.3 | 0.3  | (-0.1, 0.7) |
|     | 6/10-yearly    | 4.9 (0.0) | 729  | (567, 899)   | 88.8 | (86.7, 90.7) | 85.1 | 92.0 | 1.0  | (0.5, 1.6)  |
|     | 30, 40, 50, 65 | 3.1 (0.0) | 849  | (663, 1040)  | 87.0 | (84.5, 89.3) | 82.6 | 90.9 | 1.3  | (-0.3, 2.8) |
|     | 25, 35, 50, 65 | 3.2 (0.0) | 869  | (677, 1072)  | 86.7 | (84.2, 89.0) | 82.1 | 90.3 | 0.6  | (-0.7, 2.0) |
|     | 30, 40, 55     | 2.6 (0.0) | 895  | (698, 1099)  | 86.3 | (83.6, 88.7) | 81.9 | 90.3 | 3.3  | (2.2, 4.5)  |
|     | 30, 45, 60     | 2.4 (0.0) | 944  | (736, 1163)  | 85.6 | (82.8, 88.0) | 81.1 | 89.5 | 2.8  | (1.6, 4.1)  |
|     | 25, 45, 65     | 2.3 (0.0) | 1093 | (849, 1354)  | 83.3 | (80.3, 86.0) | 78.2 | 87.5 | -0.3 | (-1.8, 1.2) |
|     | 30, 45         | 1.7 (0.0) | 1083 | (842, 1339)  | 83.5 | (80.4, 86.2) | 77.9 | 87.8 | 4.3  | (3.0, 5.7)  |

|    |                |           |            |              |              |              |      |      |            |              |
|----|----------------|-----------|------------|--------------|--------------|--------------|------|------|------------|--------------|
|    | 30, 55         | 1.8 (0.0) | 1098       | (849, 1360)  | 83.2         | (80.1, 86.1) | 78.4 | 87.6 | 3.4        | (2.2, 4.7)   |
|    | 35             | 0.9 (0.0) | 1300       | (1001, 1615) | 80.1         | (76.7, 83.3) | 74.4 | 85.4 | 15.5       | (12.9, 18.1) |
|    | 40             | 0.9 (0.0) | 1363       | (1055, 1681) | 79.2         | (75.6, 82.5) | 73.4 | 84.4 | 13.9       | (12.1, 17.3) |
|    | 30             | 1.0 (0.0) | 1346       | (1032, 1677) | 79.5         | (75.9, 82.7) | 73.3 | 84.6 | 14.7       | (11.5, 16.4) |
|    | 45             | 0.9 (0.0) | 1518       | (1177, 1874) | 76.8         | (72.8, 80.5) | 70.3 | 82.3 | 12.3       | (10.0, 14.8) |
| V  | None           |           | 765        | (556, 1017)  | 88.4         | (86.1, 90.5) | 85.1 | 91.9 |            |              |
|    | 3/5-yearly     | 6.7 (0.0) | 230        | (167, 302)   | 96.5         | (95.6, 97.3) | 95.0 | 97.9 | 0.1        | (-0.1, 0.4)  |
|    | 6/10-yearly    | 4.7 (0.0) | 246        | (179, 322)   | 96.2         | (95.3, 97.1) | 94.6 | 97.6 | 0.4        | (0.1, 0.7)   |
|    | 30, 40, 50, 65 | 3.0 (0.0) | 287        | (212, 374)   | 95.6         | (94.5, 96.6) | 93.8 | 97.1 | 0.4        | (-0.5, 1.2)  |
|    | 25, 35, 50, 65 | 3.1 (0.0) | 292        | (215, 385)   | 95.5         | (94.4, 96.5) | 93.6 | 97.1 | 0.2        | (-0.6, 1.0)  |
|    | 30, 40, 55     | 2.5 (0.0) | 300        | (222, 390)   | 95.4         | (94.3, 96.4) | 93.5 | 96.9 | 1.1        | (0.5, 1.7)   |
|    | 30, 45, 60     | 2.4 (0.0) | 319        | (235, 418)   | 95.1         | (94.0, 96.2) | 93.2 | 96.8 | 0.8        | (0.1, 1.5)   |
|    | 25, 45, 65     | 2.2 (0.0) | 365        | (268, 481)   | 94.4         | (93.1, 95.6) | 92.0 | 96.3 | -0.2       | (-1.1, 0.7)  |
|    | 30, 45         | 1.6 (0.0) | 359        | (264, 470)   | 94.5         | (93.3, 95.7) | 92.3 | 96.3 | 1.5        | (0.8, 2.3)   |
|    | 30, 55         | 1.7 (0.0) | 372        | (275, 489)   | 94.3         | (93.0, 95.5) | 92.2 | 96.2 | 1.1        | (0.4, 1.8)   |
|    | 35             | 0.9 (0.0) | 432        | (321, 566)   | 93.4         | (92.0, 94.7) | 91.2 | 95.7 | 5.7        | (4.5, 7.0)   |
|    | 40             | 0.9 (0.0) | 453        | (336, 591)   | 93.1         | (91.6, 94.5) | 90.5 | 95.3 | 5.3        | (4.2, 6.6)   |
|    | 30             | 0.9 (0.0) | 446        | (326, 587)   | 93.2         | (91.7, 94.6) | 90.6 | 95.3 | 5.4        | (4.2, 6.6)   |
| 45 | 0.9 (0.0)      | 512       | (378, 668) | 92.2         | (90.4, 93.8) | 89.2         | 94.6 | 4.4  | (3.3, 5.5) |              |

Central Range, the 2.5th and 97.5th percentiles

Vaccine I: 100% efficacy against HPV16/18, no cross protection or waning efficacy

Vaccine II: 100% efficacy against HPV16/18, cross protection for the quadrivalent vaccine, preventing 14.7% of other high risk HPV infections

Vaccine III: 100% efficacy against HPV16/18, cross protection for the bivalent vaccine, preventing 22.1% of other high risk HPV infections

Vaccine IV: 100% initial efficacy against HPV16/18, but efficacy wanes by 0.25% (absolute) every 6 months

Vaccine V: the nonavalent vaccine, providing 100% efficacy against HPV16/18 and preventing 63.6% of other high risk HPV infections

\*Screening scenarios provide screening ages, except 3/5 (6/10)-yearly represents screening every 3(6) years aged 25-49 years and every 5(10) years aged 50-64 years.

**Table S3: Number of screens, cancers, reduction in cancer incidence and incremental benefit (the reduction in cancer incidence per additional screen) for 100% screening coverage, for each combination of vaccination and screening scenario, from 1,000 simulated datasets of 300,000 women with fixed natural history parameters given in Figure 1**

| Vaccine | Screening scenario*             | Number of screens | Number of cancers (per cohort of 300,000) |              | Cancers prevented |              |        |         | Incremental benefit |              |
|---------|---------------------------------|-------------------|-------------------------------------------|--------------|-------------------|--------------|--------|---------|---------------------|--------------|
|         |                                 |                   | Mean (sd)                                 | Mean         | 95% CR            | %            | 95% CR | Minimum | Maximum             | %            |
| None    | None                            |                   | 6835                                      | (6680, 6994) |                   |              |        |         |                     |              |
|         | <u>HPV primary testing</u>      |                   |                                           |              |                   |              |        |         |                     |              |
|         | 3/5-yearly                      | 12.7 (0.0)        | 608                                       | (559, 658)   | 91.1              | (90.4, 91.8) | 89.9   | 92.1    | 0.8                 | (0.7, 1.0)   |
|         | 6/10-yearly                     | 7.5 (0.0)         | 896                                       | (837, 959)   | 86.9              | (86.1, 87.7) | 85.7   | 88.1    | 2.6                 | (2.3, 2.9)   |
|         | 30, 40, 50, 65                  | 4.4 (0.0)         | 1462                                      | (1392, 1538) | 78.6              | (77.6, 79.5) | 76.7   | 80.6    | 2.9                 | (2.0, 3.9)   |
|         | 30, 40, 55                      | 3.4 (0.0)         | 1656                                      | (1577, 1737) | 75.8              | (74.7, 76.8) | 74.0   | 77.4    | 22.3                | (22.0, 22.6) |
|         | <u>Cytology primary testing</u> |                   |                                           |              |                   |              |        |         |                     |              |
|         | 6/10-yearly                     | 7.0 (0.0)         | 1661                                      | (1589, 1743) | 75.7              | (74.7, 76.7) | 74.1   | 77.2    | 10.9                | (10.7, 11.0) |
| I       | None                            |                   | 2050                                      | (1961, 2142) | 70.0              | (68.5, 71.4) | 67.5   | 72.4    |                     |              |
|         | 3/5-yearly                      | 12.3 (0.0)        | 196                                       | (171, 225)   | 97.1              | (96.7, 97.5) | 96.3   | 97.7    | 0.3                 | (0.2, 0.3)   |
|         | 6/10-yearly                     | 7.3 (0.0)         | 284                                       | (254, 318)   | 95.8              | (95.3, 96.3) | 95.1   | 96.5    | 0.8                 | (0.6, 1.0)   |
|         | 30, 40, 50, 65                  | 4.2 (0.0)         | 455                                       | (415, 498)   | 93.3              | (92.7, 93.9) | 92.3   | 94.1    | 1.0                 | (0.5, 1.5)   |
|         | 25, 35, 50, 65                  | 4.3 (0.0)         | 475                                       | (433, 519)   | 93.0              | (92.4, 93.6) | 91.9   | 94.0    | 0.6                 | (0.1, 1.2)   |
|         | 30, 40, 55                      | 3.2 (0.0)         | 521                                       | (477, 566)   | 92.4              | (91.7, 93.0) | 91.2   | 93.4    | 2.6                 | (2.1, 3.2)   |
|         | 30, 45, 60                      | 3.2 (0.0)         | 577                                       | (533, 623)   | 91.6              | (90.8, 92.2) | 90.5   | 92.5    | 1.9                 | (1.4, 2.5)   |
|         | 25, 45, 65                      | 3.2 (0.0)         | 739                                       | (685, 794)   | 89.2              | (88.3, 90.0) | 87.6   | 90.7    | -0.4                | (-1.1, 0.2)  |
|         | 30, 45                          | 2.2 (0.0)         | 708                                       | (654, 761)   | 89.6              | (88.8, 90.4) | 88.4   | 90.8    | 3.9                 | (3.3, 4.7)   |
|         | 30, 55                          | 2.2 (0.0)         | 779                                       | (724, 837)   | 88.6              | (87.7, 89.4) | 87.1   | 89.9    | 3.0                 | (2.3, 3.7)   |
|         | 35                              | 1.1 (0.0)         | 1000                                      | (938, 1068)  | 85.4              | (84.3, 86.3) | 83.5   | 87.2    | 14.3                | (13.4, 15.3) |
|         | 40                              | 1.1 (0.0)         | 1048                                      | (983, 1114)  | 84.7              | (83.7, 85.7) | 83.1   | 86.4    | 13.9                | (13.0, 14.8) |
|         | 30                              | 1.1 (0.0)         | 1063                                      | (998, 1126)  | 84.4              | (83.4, 85.4) | 82.9   | 86.2    | 12.7                | (11.9, 13.5) |
|         | 45                              | 1.0 (0.0)         | 1225                                      | (1159, 1298) | 82.1              | (80.9, 83.1) | 79.9   | 84.1    | 11.7                | (10.9, 12.6) |
| II      | None                            |                   | 1778                                      | (1698, 1862) | 74.0              | (72.6, 75.3) | 71.7   | 76.2    |                     |              |
|         | 3/5-yearly                      | 12.3 (0.0)        | 169                                       | (145, 195)   | 97.5              | (97.1, 97.9) | 97.0   | 98.1    | 0.2                 | (0.1, 0.3)   |
|         | 6/10-yearly                     | 7.2 (0.0)         | 246                                       | (216, 276)   | 96.4              | (96.0, 96.8) | 95.7   | 97.2    | 0.7                 | (0.5, 0.9)   |
|         | 30, 40, 50, 65                  | 4.2 (0.0)         | 392                                       | (355, 431)   | 94.3              | (93.7, 94.8) | 93.2   | 95.2    | 0.9                 | (0.4, 1.4)   |
|         | 25, 35, 50, 65                  | 4.3 (0.0)         | 411                                       | (371, 453)   | 94.0              | (93.3, 94.6) | 93.0   | 95.0    | 0.5                 | (0.0, 1.1)   |
|         | 30, 40, 55                      | 3.2 (0.0)         | 451                                       | (411, 490)   | 93.4              | (92.8, 94.0) | 92.4   | 94.4    | 2.3                 | (1.7, 2.8)   |
|         | 30, 45, 60                      | 3.1 (0.0)         | 499                                       | (457, 542)   | 92.7              | (92.0, 93.3) | 91.7   | 93.6    | 1.6                 | (1.1, 2.2)   |
|         | 25, 45, 65                      | 3.1 (0.0)         | 639                                       | (593, 688)   | 90.7              | (89.9, 91.4) | 89.5   | 91.8    | -0.4                | (-1.0, 0.2)  |

|     |                |            |      |              |      |              |      |      |      |              |
|-----|----------------|------------|------|--------------|------|--------------|------|------|------|--------------|
|     | 30, 45         | 2.1 (0.0)  | 612  | (567, 658)   | 91.0 | (90.3, 91.7) | 89.9 | 92.1 | 3.5  | (2.9, 4.1)   |
|     | 30, 55         | 2.1 (0.0)  | 674  | (627, 723)   | 90.1 | (89.4, 90.8) | 89.1 | 91.4 | 2.6  | (2.0, 3.2)   |
|     | 35             | 1.1 (0.0)  | 865  | (809, 919)   | 87.3 | (86.5, 88.2) | 86.0 | 88.7 | 12.6 | (11.7, 13.4) |
|     | 40             | 1.0 (0.0)  | 906  | (850, 964)   | 86.7 | (85.8, 87.6) | 85.3 | 88.1 | 12.2 | (11.3, 13.1) |
|     | 30             | 1.1 (0.0)  | 917  | (861, 977)   | 86.6 | (85.6, 87.5) | 85.1 | 87.8 | 11.2 | (10.4, 12.0) |
|     | 45             | 1.0 (0.0)  | 1061 | (999, 1124)  | 84.5 | (83.5, 85.5) | 83.0 | 86.3 | 10.2 | (9.4, 11.0)  |
| III | None           |            | 1628 | (1548, 1710) | 76.2 | (74.9, 77.4) | 74.0 | 78.3 |      |              |
|     | 3/5-yearly     | 12.3 (0.0) | 154  | (130, 177)   | 97.8 | (97.4, 98.1) | 97.2 | 98.3 | 0.2  | (0.1, 0.3)   |
|     | 6/10-yearly    | 7.2 (0.0)  | 224  | (194, 253)   | 96.7 | (96.3, 97.2) | 96.0 | 97.4 | 0.6  | (0.5, 0.8)   |
|     | 30, 40, 50, 65 | 4.1 (0.0)  | 359  | (325, 399)   | 94.7 | (94.2, 95.2) | 93.6 | 95.6 | 0.8  | (0.3, 1.3)   |
|     | 25, 35, 50, 65 | 4.2 (0.0)  | 376  | (336, 417)   | 94.5 | (93.9, 95.1) | 93.4 | 95.4 | 0.5  | (0.0, 1.0)   |
|     | 30, 40, 55     | 3.2 (0.0)  | 413  | (375, 454)   | 94.0 | (93.4, 94.5) | 93.0 | 95.0 | 2.1  | (1.6, 2.6)   |
|     | 30, 45, 60     | 3.1 (0.0)  | 457  | (418, 499)   | 93.3 | (92.7, 93.9) | 92.4 | 94.3 | 1.5  | (1.0, 2.0)   |
|     | 25, 45, 65     | 3.1 (0.0)  | 585  | (538, 633)   | 91.4 | (90.7, 92.1) | 90.2 | 92.8 | -0.4 | (-1.0, 0.2)  |
|     | 30, 45         | 2.1 (0.0)  | 559  | (513, 608)   | 91.8 | (91.1, 92.5) | 90.8 | 92.8 | 3.2  | (2.6, 3.8)   |
|     | 30, 55         | 2.1 (0.0)  | 616  | (569, 666)   | 91.0 | (90.2, 91.7) | 89.8 | 92.1 | 2.4  | (1.8, 3.0)   |
|     | 35             | 1.1 (0.0)  | 790  | (735, 843)   | 88.4 | (87.6, 89.3) | 86.9 | 89.9 | 11.6 | (10.7, 12.4) |
|     | 40             | 1.0 (0.0)  | 830  | (772, 885)   | 87.9 | (87.0, 88.7) | 86.4 | 89.4 | 11.2 | (10.4, 12.1) |
|     | 30             | 1.1 (0.0)  | 840  | (783, 898)   | 87.7 | (86.8, 88.6) | 86.3 | 89.1 | 10.4 | (9.6, 11.2)  |
|     | 45             | 1.0 (0.0)  | 972  | (911, 1038)  | 85.8 | (84.9, 86.7) | 84.1 | 87.2 | 9.4  | (8.6, 10.2)  |
| IV  | None           |            | 2377 | (2282, 2472) | 65.2 | (63.6, 66.8) | 62.5 | 67.5 |      |              |
|     | 3/5-yearly     | 12.4 (0.0) | 241  | (211, 274)   | 96.5 | (96.0, 96.9) | 95.6 | 97.2 | 0.3  | (0.2, 0.4)   |
|     | 6/10-yearly    | 7.3 (0.0)  | 347  | (308, 385)   | 94.9 | (94.4, 95.5) | 94.1 | 95.7 | 0.9  | (0.8, 1.1)   |
|     | 30, 40, 50, 65 | 4.2 (0.0)  | 546  | (504, 593)   | 92.0 | (91.3, 92.6) | 90.7 | 93.0 | 1.4  | (0.8, 2.0)   |
|     | 25, 35, 50, 65 | 4.3 (0.0)  | 578  | (532, 623)   | 91.5 | (90.8, 92.2) | 90.3 | 92.6 | 0.8  | (0.2, 1.4)   |
|     | 30, 40, 55     | 3.2 (0.0)  | 637  | (588, 688)   | 90.7 | (89.9, 91.4) | 89.3 | 92.0 | 3.2  | (2.5, 3.8)   |
|     | 30, 45, 60     | 3.2 (0.0)  | 692  | (639, 744)   | 89.9 | (89.1, 90.7) | 88.6 | 91.0 | 2.5  | (1.9, 3.1)   |
|     | 25, 45, 65     | 3.2 (0.0)  | 887  | (824, 944)   | 87.0 | (86.1, 88.0) | 85.5 | 88.6 | -0.3 | (-1.1, 0.4)  |
|     | 30, 45         | 2.2 (0.0)  | 865  | (807, 921)   | 87.3 | (86.5, 88.3) | 85.7 | 88.8 | 4.6  | (3.9, 5.3)   |
|     | 30, 55         | 2.2 (0.0)  | 939  | (880, 1000)  | 86.3 | (85.3, 87.2) | 84.6 | 87.6 | 3.6  | (2.8, 4.3)   |
|     | 35             | 1.1 (0.0)  | 1207 | (1139, 1275) | 82.3 | (81.3, 83.4) | 80.6 | 83.9 | 15.9 | (14.9, 16.8) |
|     | 40             | 1.1 (0.0)  | 1249 | (1182, 1320) | 81.7 | (80.6, 82.8) | 79.9 | 83.6 | 15.5 | (14.6, 16.6) |
|     | 30             | 1.2 (0.0)  | 1290 | (1223, 1361) | 81.1 | (80.0, 82.2) | 79.2 | 82.7 | 13.8 | (12.9, 14.8) |
|     | 45             | 1.0 (0.0)  | 1439 | (1367, 1513) | 78.9 | (77.8, 80.1) | 77.3 | 80.6 | 13.3 | (12.3, 14.2) |
|     | None           |            | 807  | (749, 864)   | 88.2 | (87.3, 89.1) | 86.6 | 89.6 |      |              |
|     | 3/5-yearly     | 12.1 (0.0) | 75   | (59, 93)     | 98.9 | (98.6, 99.1) | 98.4 | 99.3 | 0.1  | (0.0, 0.2)   |
|     | 6/10-yearly    | 7.1 (0.0)  | 109  | (89, 130)    | 98.4 | (98.1, 98.7) | 97.8 | 98.9 | 0.3  | (0.2, 0.4)   |
|     | 30, 40, 50, 65 | 4.1 (0.0)  | 176  | (150, 202)   | 97.4 | (97.0, 97.8) | 96.8 | 98.1 | 0.4  | (0.1, 0.7)   |
|     | 25, 35, 50, 65 | 4.1 (0.0)  | 185  | (158, 212)   | 97.3 | (96.9, 97.7) | 96.7 | 97.9 | 0.2  | (-0.1, 0.6)  |



|   |            |           |     |            |      |              |      |      |      |             |
|---|------------|-----------|-----|------------|------|--------------|------|------|------|-------------|
| V | 30, 40, 55 | 3.1 (0.0) | 203 | (176, 230) | 97.0 | (96.6, 97.4) | 96.4 | 97.7 | 1.0  | (0.7, 1.4)  |
|   | 30, 45, 60 | 3.1 (0.0) | 224 | (195, 254) | 96.7 | (96.3, 97.2) | 96.0 | 97.5 | 0.7  | (0.4, 1.1)  |
|   | 25, 45, 65 | 3.1 (0.0) | 288 | (254, 323) | 95.8 | (95.3, 96.3) | 95.0 | 96.7 | -0.2 | (-0.6, 0.2) |
|   | 30, 45     | 2.1 (0.0) | 274 | (240, 307) | 96.0 | (95.5, 96.5) | 95.2 | 96.8 | 1.6  | (1.2, 2.1)  |
|   | 30, 55     | 2.1 (0.0) | 303 | (269, 337) | 95.6 | (95.1, 96.1) | 94.8 | 96.4 | 1.2  | (0.7, 1.7)  |
|   | 35         | 1.0 (0.0) | 389 | (350, 430) | 94.3 | (93.7, 94.9) | 93.3 | 95.4 | 6.0  | (5.4, 6.6)  |
|   | 40         | 1.0 (0.0) | 409 | (368, 447) | 94.0 | (93.4, 94.7) | 93.1 | 95.2 | 5.7  | (5.1, 6.3)  |
|   | 30         | 1.1 (0.0) | 412 | (370, 453) | 94.0 | (93.3, 94.6) | 92.8 | 95.0 | 5.5  | (4.9, 6.1)  |
|   | 45         | 1.0 (0.0) | 480 | (438, 522) | 93.0 | (92.3, 93.6) | 91.8 | 94.0 | 4.7  | (4.2, 5.3)  |

Central Range, the 2.5th and 97.5th percentiles

Vaccine I: 100% efficacy against HPV16/18, no cross protection or waning efficacy

Vaccine II: 100% efficacy against HPV16/18, cross protection for the quadrivalent vaccine, preventing 14.7% of other high risk HPV infections

Vaccine III: 100% efficacy against HPV16/18, cross protection for the bivalent vaccine, preventing 22.1% of other high risk HPV infections

Vaccine IV: 100% initial efficacy against HPV16/18, but efficacy wanes by 0.25% (absolute) every 6 months

Vaccine V: the nonavalent vaccine, providing 100% efficacy against HPV16/18 and preventing 63.6% of other high risk HPV infections

\*Screening scenarios provide screening ages, except 3/5 (6/10)-yearly represents screening every 3(6) years aged 25-49 years and every 5(10) years aged 50-64 years.

**Table S4: Number of screens, cancers, reduction in cancer incidence and incremental benefit (the reduction in cancer incidence per additional screen) for realistic screening coverage, for each combination of vaccination and screening scenario, from 1,000 simulated datasets of 300,000 women with fixed natural history parameters given in Figure 1**

| Vaccine     | Screening scenario*             | Number of screens | Number of cancers (per cohort of 300,000) |              | Cancers prevented |              |        |         | Incremental benefit |              |
|-------------|---------------------------------|-------------------|-------------------------------------------|--------------|-------------------|--------------|--------|---------|---------------------|--------------|
|             |                                 |                   | Mean (sd)                                 | Mean         | 95% CR            | %            | 95% CR | Minimum | Maximum             | %            |
| None        | None                            |                   | 6835                                      | (6680, 6994) |                   |              |        |         |                     |              |
|             | <u>HPV primary testing</u>      |                   |                                           |              |                   |              |        |         |                     |              |
|             | 3/5-yearly                      | 7.2 (0.0)         | 1955                                      | (1867, 2039) | 71.4              | (70.3, 72.5) | 69.7   | 72.8    | 0.9                 | (0.3, 1.6)   |
|             | 6/10-yearly                     | 5.1 (0.0)         | 2087                                      | (2001, 2173) | 69.5              | (68.4, 70.5) | 67.6   | 71.4    | 3.0                 | (2.3, 3.7)   |
|             | 30, 40, 50, 65                  | 3.2 (0.0)         | 2467                                      | (2371, 2560) | 63.9              | (62.8, 65.1) | 62.0   | 66.0    | 2.9                 | (0.5, 5.4)   |
|             | 30, 40, 55                      | 2.7 (0.0)         | 2575                                      | (2482, 2673) | 62.3              | (61.1, 63.5) | 60.1   | 64.6    | 23.2                | (22.8, 23.7) |
|             | <u>Cytology primary testing</u> |                   |                                           |              |                   |              |        |         |                     |              |
|             | 3/5-yearly                      | 6.6 (0.0)         | 2632                                      | (2530, 2725) | 61.5              | (60.3, 62.6) | 59.3   | 63.6    | 1.6                 | (0.9, 2.3)   |
| 6/10-yearly | 4.6 (0.0)                       | 2850              | (2754, 2951)                              | 58.3         | (57.2, 59.4)      | 56.2         | 60.5   | 12.8    | (12.5, 13.0)        |              |
| I           | None                            |                   | 2050                                      | (1961, 2142) | 70.0              | (68.5, 71.4) | 67.5   | 72.4    |                     |              |
|             | 3/5-yearly                      | 6.9 (0.0)         | 609                                       | (561, 657)   | 91.1              | (90.4, 91.8) | 89.8   | 92.3    | 0.3                 | (-0.1, 0.6)  |
|             | 6/10-yearly                     | 4.8 (0.0)         | 648                                       | (598, 699)   | 90.5              | (89.7, 91.2) | 89.1   | 91.6    | 0.9                 | (0.5, 1.4)   |
|             | 30, 40, 50, 65                  | 3.1 (0.0)         | 756                                       | (703, 812)   | 88.9              | (88.1, 89.7) | 87.7   | 90.1    | 1.0                 | (-0.3, 2.4)  |
|             | 25, 35, 50, 65                  | 3.2 (0.0)         | 774                                       | (719, 832)   | 88.7              | (87.8, 89.5) | 87.2   | 90.0    | 0.5                 | (-0.7, 1.6)  |
|             | 30, 40, 55                      | 2.5 (0.0)         | 795                                       | (738, 854)   | 88.4              | (87.4, 89.2) | 86.7   | 89.7    | 2.7                 | (1.9, 3.6)   |
|             | 30, 45, 60                      | 2.4 (0.0)         | 844                                       | (787, 901)   | 87.6              | (86.7, 88.5) | 86.3   | 88.8    | 2.2                 | (1.2, 3.3)   |
|             | 25, 45, 65                      | 2.3 (0.0)         | 976                                       | (911, 1044)  | 85.7              | (84.6, 86.7) | 84.1   | 87.4    | -0.5                | (-1.8, 0.9)  |
|             | 30, 45                          | 1.7 (0.0)         | 956                                       | (898, 1019)  | 86.0              | (85.0, 86.9) | 84.5   | 87.7    | 3.9                 | (2.9, 5.0)   |
|             | 30, 55                          | 1.8 (0.0)         | 985                                       | (924, 1050)  | 85.6              | (84.5, 86.5) | 84.1   | 87.1    | 2.9                 | (1.9, 3.8)   |
|             | 35                              | 0.9 (0.0)         | 1159                                      | (1089, 1228) | 83.0              | (81.9, 84.1) | 81.0   | 84.7    | 14.1                | (13.1, 15.2) |
|             | 40                              | 0.9 (0.0)         | 1217                                      | (1147, 1289) | 82.2              | (81.0, 83.3) | 79.8   | 83.8    | 13.4                | (12.5, 14.4) |
|             | 30                              | 1.0 (0.0)         | 1196                                      | (1129, 1263) | 82.5              | (81.4, 83.5) | 80.5   | 84.1    | 12.8                | (11.9, 13.9) |
| 45          | 0.9 (0.0)                       | 1367              | (1291, 1440)                              | 80.0         | (78.9, 81.1)      | 77.3         | 81.8   | 11.2    | (10.3, 12.1)        |              |
|             | None                            |                   | 1778                                      | (1698, 1862) | 74.0              | (72.6, 75.3) | 71.7   | 76.2    |                     |              |
|             | 3/5-yearly                      | 6.8 (0.0)         | 527                                       | (487, 574)   | 92.3              | (91.6, 92.9) | 91.3   | 93.2    | 0.2                 | (-0.1, 0.6)  |
|             | 6/10-yearly                     | 4.8 (0.0)         | 561                                       | (517, 609)   | 91.8              | (91.1, 92.4) | 90.7   | 92.8    | 0.8                 | (0.4, 1.2)   |
|             | 30, 40, 50, 65                  | 3.1 (0.0)         | 655                                       | (603, 704)   | 90.4              | (89.7, 91.2) | 89.1   | 91.8    | 0.9                 | (-0.4, 2.2)  |

|     |                |           |      |              |      |              |      |      |      |              |
|-----|----------------|-----------|------|--------------|------|--------------|------|------|------|--------------|
| II  | 25, 35, 50, 65 | 3.2 (0.0) | 689  | (624, 721)   | 90.2 | (89.4, 90.9) | 88.8 | 91.4 | 0.4  | (-0.8, 1.6)  |
|     | 30, 40, 55     | 2.5 (0.0) | 670  | (638, 741)   | 89.9 | (89.2, 90.7) | 88.7 | 91.1 | 2.4  | (1.6, 3.2)   |
|     | 30, 45, 60     | 2.4 (0.0) | 731  | (679, 782)   | 89.3 | (88.5, 90.1) | 88.2 | 90.5 | 1.9  | (1.0, 2.9)   |
|     | 25, 45, 65     | 2.3 (0.0) | 845  | (790, 902)   | 87.6 | (86.8, 88.5) | 86.0 | 88.9 | -0.4 | (-1.6, 0.8)  |
|     | 30, 45         | 1.7 (0.0) | 827  | (771, 882)   | 87.9 | (87.1, 88.8) | 86.6 | 89.3 | 3.5  | (2.5, 4.5)   |
|     | 30, 55         | 1.8 (0.0) | 853  | (797, 912)   | 87.5 | (86.6, 88.3) | 86.0 | 88.8 | 2.5  | (1.7, 3.4)   |
|     | 35             | 0.9 (0.0) | 1004 | (945, 1063)  | 85.3 | (84.4, 86.3) | 83.7 | 86.7 | 12.4 | (11.4, 13.3) |
|     | 40             | 0.9 (0.0) | 1054 | (990, 1120)  | 84.6 | (83.5, 85.6) | 82.7 | 86.5 | 11.7 | (10.8, 12.7) |
|     | 30             | 1.0 (0.0) | 1034 | (972, 1095)  | 84.9 | (83.9, 85.8) | 83.3 | 86.6 | 11.4 | (10.5, 12.3) |
|     | 45             | 0.9 (0.0) | 1185 | (1115, 1253) | 82.7 | (81.6, 83.7) | 81.0 | 84.2 | 9.8  | (8.9, 10.7)  |
| III | None           |           | 1628 | (1548, 1710) | 76.2 | (74.9, 77.4) | 74.0 | 78.3 |      |              |
|     | 3/5-yearly     | 6.8 (0.0) | 483  | (440, 522)   | 92.9 | (92.3, 93.6) | 92.0 | 93.8 | 0.2  | (-0.1, 0.5)  |
|     | 6/10-yearly    | 4.7 (0.0) | 513  | (221, 284)   | 92.5 | (91.9, 93.1) | 91.3 | 93.6 | 0.7  | (0.4, 1.1)   |
|     | 30, 40, 50, 65 | 3.0 (0.0) | 601  | (554, 650)   | 91.2 | (90.5, 91.9) | 90.1 | 92.5 | 0.8  | (-0.4, 2.0)  |
|     | 25, 35, 50, 65 | 3.1 (0.0) | 612  | (566, 660)   | 91.0 | (90.3, 91.7) | 89.9 | 92.1 | 0.4  | (-0.7, 1.5)  |
|     | 30, 40, 55     | 2.5 (0.0) | 629  | (582, 680)   | 90.8 | (90.0, 91.5) | 89.5 | 91.9 | 2.2  | (1.3, 3.0)   |
|     | 30, 45, 60     | 2.4 (0.0) | 669  | (620, 718)   | 90.2 | (89.5, 91.0) | 89.0 | 91.4 | 1.7  | (0.9, 2.6)   |
|     | 25, 45, 65     | 2.2 (0.0) | 773  | (722, 826)   | 88.7 | (87.9, 89.5) | 87.3 | 90.0 | -0.4 | (-1.6, 0.8)  |
|     | 30, 45         | 1.6 (0.0) | 756  | (703, 810)   | 88.9 | (88.1, 89.7) | 87.7 | 90.2 | 3.2  | (2.2, 4.0)   |
|     | 30, 55         | 1.7 (0.0) | 780  | (727, 839)   | 88.6 | (87.7, 89.4) | 87.3 | 89.8 | 2.3  | (1.5, 3.1)   |
|     | 35             | 0.9 (0.0) | 917  | (859, 975)   | 86.6 | (85.7, 87.5) | 85.0 | 88.0 | 11.4 | (10.5, 12.3) |
|     | 40             | 0.9 (0.0) | 964  | (903, 1028)  | 85.9 | (84.9, 86.8) | 84.2 | 87.3 | 10.8 | (9.9, 11.8)  |
|     | 30             | 0.9 (0.0) | 946  | (887, 1010)  | 86.2 | (85.2, 87.1) | 84.6 | 87.6 | 10.5 | (9.6, 11.4)  |
|     | 45             | 0.9 (0.0) | 1084 | (1022, 1149) | 84.1 | (83.1, 85.1) | 82.5 | 85.6 | 9.0  | (8.2, 9.8)   |
| IV  | None           |           | 2377 | (2282, 2472) | 65.2 | (63.6, 66.8) | 62.5 | 67.5 |      |              |
|     | 3/5-yearly     | 6.9 (0.0) | 733  | (685, 787)   | 89.3 | (88.4, 90.0) | 87.6 | 90.6 | 0.3  | (-0.1, 0.7)  |
|     | 6/10-yearly    | 4.9 (0.0) | 775  | (722, 826)   | 88.7 | (87.9, 89.5) | 87.2 | 89.9 | 1.0  | (0.6, 1.5)   |
|     | 30, 40, 50, 65 | 3.1 (0.0) | 900  | (844, 959)   | 86.8 | (85.9, 87.7) | 85.2 | 88.3 | 1.3  | (-0.2, 2.7)  |
|     | 25, 35, 50, 65 | 3.2 (0.0) | 926  | (868, 980)   | 86.4 | (85.6, 87.3) | 85.1 | 87.9 | 0.5  | (-0.6, 1.8)  |
|     | 30, 40, 55     | 2.6 (0.0) | 950  | (892, 1011)  | 86.1 | (85.2, 87.0) | 84.4 | 87.4 | 3.3  | (2.4, 4.3)   |
|     | 30, 45, 60     | 2.4 (0.0) | 1003 | (945, 1069)  | 85.3 | (84.3, 86.2) | 83.5 | 86.8 | 2.8  | (1.8, 4.0)   |
|     | 25, 45, 65     | 2.3 (0.0) | 1163 | (1098, 1230) | 83.0 | (81.9, 84.0) | 80.8 | 84.9 | -0.4 | (-1.7, 1.1)  |
|     | 30, 45         | 1.7 (0.0) | 1147 | (1083, 1214) | 83.2 | (82.2, 84.3) | 81.1 | 84.8 | 4.5  | (3.4, 5.7)   |

|   |                |           |      |              |      |              |      |      |      |              |
|---|----------------|-----------|------|--------------|------|--------------|------|------|------|--------------|
|   | 30, 55         | 1.8 (0.0) | 1172 | (1105, 1239) | 82.9 | (81.8, 84.0) | 81.2 | 84.6 | 3.5  | (2.5, 4.5)   |
|   | 35             | 0.9 (0.0) | 1384 | (1313, 1462) | 79.7 | (78.5, 81.0) | 78.0 | 81.6 | 15.6 | (14.6, 16.7) |
|   | 40             | 0.9 (0.0) | 1439 | (1367, 1516) | 78.9 | (77.7, 80.1) | 77.2 | 80.7 | 15.0 | (13.9, 16.1) |
|   | 30             | 1.0 (0.0) | 1436 | (1363, 1505) | 79.0 | (77.8, 80.1) | 76.8 | 80.8 | 14.0 | (13.0, 15.0) |
|   | 45             | 0.9 (0.0) | 1601 | (1526, 1677) | 76.6 | (75.3, 77.8) | 74.6 | 78.4 | 12.7 | (11.7, 13.7) |
| V | None           |           | 807  | (749, 864)   | 88.2 | (87.3, 89.1) | 86.6 | 89.6 |      |              |
|   | 3/5-yearly     | 6.7 (0.0) | 238  | (207, 269)   | 96.5 | (96.0, 97.0) | 95.6 | 97.2 | 0.1  | (-0.1, 0.3)  |
|   | 6/10-yearly    | 4.7 (0.0) | 253  | (221, 284)   | 96.3 | (95.8, 96.8) | 95.5 | 97.1 | 0.4  | (0.1, 0.7)   |
|   | 30, 40, 50, 65 | 3.0 (0.0) | 296  | (259, 329)   | 95.7 | (95.2, 96.2) | 94.8 | 96.6 | 0.4  | (-0.5, 1.2)  |
|   | 25, 35, 50, 65 | 3.1 (0.0) | 302  | (267, 337)   | 95.6 | (95.1, 96.1) | 94.8 | 96.4 | 0.2  | (-0.6, 1.1)  |
|   | 30, 40, 55     | 2.5 (0.0) | 310  | (273, 346)   | 95.5 | (94.9, 96.0) | 94.6 | 96.3 | 1.1  | (0.5, 1.7)   |
|   | 30, 45, 60     | 2.4 (0.0) | 329  | (295, 366)   | 95.2 | (94.6, 95.7) | 94.2 | 96.2 | 0.9  | (0.2, 1.5)   |
|   | 25, 45, 65     | 2.2 (0.0) | 381  | (344, 419)   | 94.4 | (93.8, 95.0) | 93.5 | 95.3 | -0.2 | (-1.0, 0.6)  |
|   | 30, 45         | 1.6 (0.0) | 373  | (335, 410)   | 94.5 | (94.0, 95.1) | 93.6 | 95.6 | 1.6  | (1.0, 2.3)   |
|   | 30, 55         | 1.7 (0.0) | 384  | (348, 423)   | 94.4 | (93.8, 94.9) | 93.5 | 95.3 | 1.2  | (0.5, 1.8)   |
|   | 35             | 0.9 (0.0) | 452  | (409, 494)   | 93.4 | (92.8, 94.0) | 92.3 | 94.3 | 5.9  | (5.2, 6.5)   |
|   | 40             | 0.9 (0.0) | 476  | (433, 518)   | 93.0 | (92.4, 93.7) | 92.0 | 94.1 | 5.5  | (4.9, 6.2)   |
|   | 30             | 0.9 (0.0) | 466  | (421, 512)   | 93.2 | (92.5, 93.9) | 92.1 | 94.1 | 5.5  | (4.9, 6.1)   |
|   | 45             | 0.9 (0.0) | 537  | (490, 584)   | 92.1 | (91.4, 92.8) | 90.9 | 93.2 | 4.5  | (4.0, 5.1)   |

Central Range, the 2.5th and 97.5th percentiles

Vaccine I: 100% efficacy against HPV16/18, no cross protection or waning efficacy

Vaccine II: 100% efficacy against HPV16/18, cross protection for the quadrivalent vaccine, preventing 14.7% of other high risk HPV infections

Vaccine III: 100% efficacy against HPV16/18, cross protection for the bivalent vaccine, preventing 22.1% of other high risk HPV infections

Vaccine IV: 100% initial efficacy against HPV16/18, but efficacy wanes by 0.25% (absolute) every 6 months

Vaccine V: the nonavalent vaccine, providing 100% efficacy against HPV16/18 and preventing 63.6% of other high risk HPV infections

\*Screening scenarios provide screening ages, except 3/5 (6/10)-yearly represents screening every 3(6) years aged 25-49 years and every 5(10) years aged 50-64 years.

**Table S5: Number of screens, cancers, reduction in cancer incidence and incremental benefit (the reduction in cancer incidence per additional screen) for 100% screening coverage, for each combination of vaccination and screening scenario, from simulated datasets of 300,000 women with natural history parameters drawn from the distributions given in Figure 1 which had a lifetime risk of cervical cancer in the absence of vaccination or screening  $\leq 1.7\%$**

| Vaccine     | Screening scenario*             | Number of screens | Number of cancers (per cohort of 300,000) |              | Cancers prevented |              |        |         | Incremental benefit |              |
|-------------|---------------------------------|-------------------|-------------------------------------------|--------------|-------------------|--------------|--------|---------|---------------------|--------------|
|             |                                 |                   | Mean (sd)                                 | Mean         | 95% CR            | %            | 95% CR | Minimum | Maximum             | %            |
| None        | None                            |                   | 4759                                      | (4240, 4995) |                   |              |        |         |                     |              |
|             | <u>HPV primary testing</u>      |                   |                                           |              |                   |              |        |         |                     |              |
|             | 3/5-yearly                      | 12.7 (0.0)        | 499                                       | (405, 568)   | 89.5              | (88.2, 91.1) | 86.9   | 92.1    | 0.9                 | (0.7, 1.2)   |
|             | 6/10-yearly                     | 7.5 (0.1)         | 729                                       | (610, 826)   | 84.7              | (82.6, 86.8) | 81.0   | 87.8    | 2.8                 | (2.3, 3.2)   |
|             | 30, 40, 50, 65                  | 4.4 (0.0)         | 1152                                      | (984, 1279)  | 75.8              | (73.1, 78.5) | 71.0   | 80.3    | 3.3                 | (2.1, 4.6)   |
|             | 30, 40, 55                      | 3.4 (0.0)         | 1307                                      | (1122, 1445) | 72.5              | (70.0, 76.0) | 66.9   | 77.7    | 21.4                | (20.5, 22.3) |
|             | <u>Cytology primary testing</u> |                   |                                           |              |                   |              |        |         |                     |              |
|             | 3/5-yearly                      | 12.0 (0.0)        | 732                                       | (603, 835)   | 84.5              | (82.4, 86.7) | 81.2   | 88.5    | 1.7                 | (1.4, 2.0)   |
| 6/10-yearly | 7.0 (0.0)                       | 1130              | (962, 1267)                               | 76.0         | (73.4, 79.3)      | 70.5         | 81.0   | 10.9    | (10.5, 11.3)        |              |
| I           | None                            |                   | 1440                                      | (1144, 1721) | 69.7              | (64.8, 75.0) | 63.7   | 76.8    |                     |              |
|             | 3/5-yearly                      | 12.3 (0.0)        | 166                                       | (124, 211)   | 96.5              | (95.5, 97.4) | 95.2   | 97.8    | 0.3                 | (0.2, 0.4)   |
|             | 6/10-yearly                     | 7.3 (0.0)         | 234                                       | (178, 286)   | 95.1              | (93.7, 96.2) | 93.4   | 96.7    | 0.9                 | (0.6, 1.1)   |
|             | 30, 40, 50, 65                  | 4.2 (0.0)         | 360                                       | (274, 436)   | 92.4              | (90.8, 94.1) | 90.4   | 94.8    | 1.0                 | (0.5, 1.6)   |
|             | 25, 35, 50, 65                  | 4.3 (0.0)         | 380                                       | (291, 459)   | 92.0              | (90.4, 93.8) | 90.0   | 94.7    | 0.5                 | (-0.2, 1.2)  |
|             | 30, 40, 55                      | 3.2 (0.0)         | 406                                       | (319, 481)   | 91.5              | (89.6, 93.2) | 89.0   | 94.1    | 2.6                 | (1.8, 3.7)   |
|             | 30, 45, 60                      | 3.2 (0.0)         | 448                                       | (356, 541)   | 90.6              | (88.9, 92.5) | 88.3   | 93.2    | 1.8                 | (1.0, 2.6)   |
|             | 25, 45, 65                      | 3.2 (0.0)         | 557                                       | (445, 670)   | 88.3              | (86.0, 90.4) | 85.6   | 91.6    | -0.5                | (-1.4, 0.4)  |
|             | 30, 45                          | 2.1 (0.0)         | 535                                       | (427, 658)   | 88.8              | (86.6, 90.9) | 86.0   | 91.5    | 4.0                 | (2.8, 5.0)   |
|             | 30, 55                          | 2.2 (0.0)         | 592                                       | (473, 712)   | 87.5              | (85.3, 89.9) | 84.6   | 91.0    | 2.9                 | (1.8, 4.0)   |
|             | 35                              | 1.1 (0.0)         | 743                                       | (599, 899)   | 84.4              | (81.6, 87.3) | 80.3   | 88.6    | 13.7                | (11.1, 16.6) |
|             | 40                              | 1.1 (0.0)         | 788                                       | (621, 944)   | 83.4              | (80.4, 86.4) | 78.8   | 87.5    | 13.0                | (10.1, 15.6) |
|             | 30                              | 1.1 (0.0)         | 778                                       | (620, 939)   | 83.6              | (80.8, 87.0) | 79.2   | 87.8    | 12.3                | (9.8, 14.7)  |
|             | 45                              | 1.0 (0.0)         | 905                                       | (729, 1075)  | 81.0              | (77.8, 84.3) | 76.9   | 85.2    | 10.9                | (8.3, 13.1)  |
|             | None                            |                   | 1256                                      | (992, 1499)  | 73.6              | (69.2, 78.5) | 68.4   | 79.1    |                     |              |
|             | 3/5-yearly                      | 12.3 (0.0)        | 130                                       | (96, 165)    | 97.3              | (96.6, 97.9) | 95.7   | 98.1    | 0.3                 | (0.2, 0.4)   |
|             | 6/10-yearly                     | 7.2 (0.0)         | 190                                       | (142, 246)   | 96.0              | (94.9, 96.9) | 94.3   | 97.2    | 0.8                 | (0.6, 1.1)   |

|     |                |            |      |              |      |              |      |      |      |             |
|-----|----------------|------------|------|--------------|------|--------------|------|------|------|-------------|
| II  | 30, 40, 50, 65 | 4.2 (0.0)  | 311  | (241, 377)   | 93.5 | (92.2, 95.0) | 91.0 | 95.8 | 0.8  | (0.2, 1.4)  |
|     | 25, 35, 50, 65 | 4.3 (0.0)  | 320  | (248, 392)   | 93.3 | (91.7, 94.8) | 91.3 | 95.6 | 0.6  | (-0.1, 1.1) |
|     | 30, 40, 55     | 3.2 (0.0)  | 350  | (319, 481)   | 92.6 | (91.0, 94.2) | 90.6 | 95.2 | 2.2  | (1.5, 2.9)  |
|     | 30, 45, 60     | 3.1 (0.0)  | 379  | (299, 465)   | 92.0 | (90.4, 93.8) | 89.4 | 94.6 | 1.6  | (0.9, 2.3)  |
|     | 25, 45, 65     | 3.1 (0.0)  | 473  | (378, 573)   | 90.0 | (88.1, 92.0) | 87.3 | 92.6 | -0.3 | (-1.2, 0.4) |
|     | 30, 45         | 2.1 (0.0)  | 457  | (368, 550)   | 90.4 | (88.4, 92.5) | 87.5 | 93.6 | 3.7  | (2.8, 4.7)  |
|     | 30, 55         | 2.1 (0.0)  | 505  | (404, 615)   | 89.4 | (87.3, 91.4) | 86.1 | 92.7 | 2.7  | (1.7, 3.8)  |
|     | 35             | 1.1 (0.0)  | 644  | (515, 779)   | 86.5 | (83.9, 89.2) | 83.0 | 90.2 | 12.1 | (9.6, 14.9) |
|     | 40             | 1.0 (0.0)  | 683  | (553, 826)   | 85.6 | (83.0, 88.2) | 82.2 | 89.5 | 11.5 | (9.1, 13.7) |
|     | 30             | 1.1 (0.0)  | 675  | (534, 806)   | 85.8 | (83.2, 88.5) | 81.9 | 89.8 | 10.9 | (8.6, 13.5) |
|     | 45             | 1.0 (0.0)  | 777  | (615, 938)   | 83.7 | (80.7, 86.9) | 80.4 | 87.5 | 9.8  | (7.7, 11.6) |
| III | None           |            | 1143 | (913, 1359)  | 76.0 | (72.1, 80.4) | 70.9 | 81.5 |      |             |
|     | 3/5-yearly     | 12.2 (0.0) | 121  | (93, 148)    | 97.5 | (96.9, 98.0) | 96.6 | 98.4 | 0.2  | (0.1, 0.3)  |
|     | 6/10-yearly    | 7.2 (0.0)  | 174  | (134, 211)   | 96.3 | (95.6, 97.1) | 95.4 | 97.5 | 0.7  | (0.5, 1.0)  |
|     | 30, 40, 50, 65 | 4.1 (0.0)  | 278  | (219, 334)   | 94.1 | (93.0, 95.4) | 92.7 | 95.8 | 0.8  | (0.2, 1.3)  |
|     | 25, 35, 50, 65 | 4.2 (0.0)  | 286  | (227, 348)   | 94.0 | (92.8, 95.2) | 92.4 | 95.6 | 0.6  | (-0.1, 1.3) |
|     | 30, 40, 55     | 3.2 (0.0)  | 316  | (246, 374)   | 93.4 | (92.2, 94.8) | 91.5 | 95.1 | 2.3  | (2.4, 4.2)  |
|     | 30, 45, 60     | 3.1 (0.0)  | 348  | (283, 416)   | 92.7 | (91.3, 94.1) | 91.0 | 94.5 | 1.6  | (0.9, 2.5)  |
|     | 25, 45, 65     | 3.1 (0.0)  | 444  | (359, 540)   | 90.7 | (89.0, 92.4) | 88.4 | 93.0 | -0.4 | (-1.2, 0.3) |
|     | 30, 45         | 2.1 (0.0)  | 427  | (345, 517)   | 91.0 | (89.3, 92.7) | 88.9 | 93.3 | 3.0  | (2.0, 4.0)  |
|     | 30, 55         | 2.1 (0.0)  | 462  | (371, 554)   | 90.3 | (88.5, 92.1) | 87.8 | 92.4 | 2.3  | (1.2, 3.3)  |
|     | 35             | 1.1 (0.0)  | 576  | (453, 699)   | 87.9 | (85.7, 90.2) | 84.9 | 90.9 | 11.3 | (8.8, 13.5) |
|     | 40             | 1.0 (0.0)  | 611  | (495, 719)   | 87.2 | (85.2, 89.5) | 84.0 | 90.0 | 10.7 | (8.6, 13.1) |
|     | 30             | 1.1 (0.0)  | 612  | (482, 742)   | 87.1 | (84.9, 89.7) | 83.6 | 90.2 | 10.1 | (8.1, 12.0) |
|     | 45             | 1.0 (0.0)  | 719  | (574, 860)   | 84.9 | (82.4, 87.7) | 81.3 | 88.5 | 8.7  | (6.7, 10.7) |
| IV  | None           |            | 1681 | (1370, 1937) | 64.7 | (60.2, 70.2) | 58.8 | 72.3 |      |             |
|     | 3/5-yearly     | 12.3 (0.0) | 199  | (155, 237)   | 95.8 | (95.0, 96.7) | 94.6 | 97.3 | 0.3  | (0.2, 0.4)  |
|     | 6/10-yearly    | 7.3 (0.0)  | 277  | (220, 326)   | 94.2 | (93.1, 95.4) | 92.6 | 96.1 | 1.1  | (0.8, 1.3)  |
|     | 30, 40, 50, 65 | 4.2 (0.0)  | 435  | (339, 515)   | 90.8 | (89.4, 92.6) | 88.8 | 93.6 | 1.4  | (0.5, 2.2)  |
|     | 25, 35, 50, 65 | 4.3 (0.0)  | 500  | (356, 528)   | 90.6 | (89.0, 92.5) | 88.3 | 93.1 | 1.0  | (0.3, 1.7)  |
|     | 30, 40, 55     | 3.2 (0.0)  | 448  | (393, 586)   | 89.5 | (87.8, 91.5) | 87.1 | 92.4 | 3.3  | (1.5, 3.1)  |
|     | 30, 45, 60     | 3.2 (0.0)  | 533  | (427, 624)   | 88.8 | (87.0, 90.9) | 86.5 | 91.8 | 2.7  | (1.9, 3.6)  |
|     | 25, 45, 65     | 3.2 (0.0)  | 672  | (555, 787)   | 85.9 | (83.5, 88.3) | 82.8 | 89.2 | -0.2 | (-1.1, 0.8) |

|   |                |            |      |             |      |              |      |      |      |              |
|---|----------------|------------|------|-------------|------|--------------|------|------|------|--------------|
|   | 30, 45         | 2.2 (0.0)  | 664  | (547, 778)  | 86.0 | (83.9, 88.4) | 82.6 | 89.9 | 4.3  | (3.1, 5.6)   |
|   | 30, 55         | 2.2 (0.0)  | 707  | (563, 817)  | 85.1 | (83.0, 87.7) | 82.3 | 88.9 | 3.5  | (2.2, 4.7)   |
|   | 35             | 1.1 (0.0)  | 887  | (719, 1022) | 81.3 | (78.7, 84.6) | 77.6 | 85.6 | 15.5 | (12.9, 18.2) |
|   | 40             | 1.1 (0.0)  | 938  | (749, 1092) | 80.3 | (77.4, 83.7) | 75.9 | 85.2 | 14.7 | (12.2, 17.3) |
|   | 30             | 1.1 (0.0)  | 936  | (779, 1071) | 80.3 | (77.2, 83.4) | 75.9 | 85.0 | 13.7 | (11.3, 15.9) |
|   | 45             | 1.0 (0.0)  | 1080 | (864, 1249) | 77.3 | (74.1, 81.1) | 73.2 | 82.9 | 12.2 | (9.8, 14.6)  |
| V | None           |            | 569  | (447, 674)  | 88.0 | (86.1, 90.4) | 85.5 | 91.9 |      |              |
|   | 3/5-yearly     | 12.1 (0.0) | 66   | (46, 86)    | 98.6 | (98.2, 99.0) | 98.0 | 99.2 | 0.1  | (0.1, 0.2)   |
|   | 6/10-yearly    | 7.1 (0.0)  | 96   | (70, 122)   | 98.0 | (97.4, 98.5) | 97.3 | 98.7 | 0.4  | (0.2, 0.5)   |
|   | 30, 40, 50, 65 | 4.1 (0.0)  | 148  | (114, 182)  | 96.9 | (96.2, 97.6) | 95.9 | 98.0 | 0.4  | (-0.0, 0.8)  |
|   | 25, 35, 50, 65 | 4.1 (0.0)  | 149  | (115, 186)  | 96.9 | (96.2, 97.5) | 96.1 | 97.8 | 0.4  | (-0.1, 0.8)  |
|   | 30, 40, 55     | 3.1 (0.0)  | 167  | (127, 203)  | 96.5 | (95.8, 97.3) | 95.5 | 97.7 | 1.0  | (0.6, 1.4)   |
|   | 30, 45, 60     | 3.1 (0.0)  | 179  | (132, 218)  | 96.2 | (95.4, 97.1) | 95.0 | 97.5 | 0.7  | (0.3, 1.2)   |
|   | 25, 45, 65     | 3.1 (0.0)  | 219  | (170, 265)  | 95.4 | (94.5, 96.4) | 94.0 | 97.2 | -0.1 | (-0.6, 0.4)  |
|   | 30, 45         | 2.1 (0.0)  | 215  | (168, 263)  | 95.5 | (94.6, 96.4) | 94.3 | 97.1 | 1.6  | (1.0, 2.2)   |
|   | 30, 55         | 2.1 (0.0)  | 236  | (179, 286)  | 95.0 | (94.1, 96.1) | 93.7 | 96.6 | 1.1  | (0.5, 1.9)   |
|   | 35             | 1.0 (0.0)  | 291  | (224, 353)  | 93.9 | (92.7, 95.1) | 92.3 | 95.6 | 5.7  | (4.4, 6.8)   |
|   | 40             | 1.0 (0.0)  | 313  | (241, 378)  | 93.4 | (92.2, 94.7) | 91.9 | 95.3 | 5.3  | (4.0, 6.3)   |
|   | 30             | 1.1 (0.0)  | 302  | (234, 372)  | 93.6 | (92.4, 94.9) | 92.0 | 95.4 | 5.3  | (4.1, 6.5)   |
|   | 45             | 1.0 (0.0)  | 365  | (279, 438)  | 92.3 | (90.9, 93.9) | 90.6 | 94.6 | 4.2  | (3.1, 5.2)   |

Central Range, the 2.5th and 97.5th percentiles

Vaccine I: 100% efficacy against HPV16/18, no cross protection or waning efficacy

Vaccine II: 100% efficacy against HPV16/18, cross protection for the quadrivalent vaccine, preventing 14.7% of other high risk HPV infections

Vaccine III: 100% efficacy against HPV16/18, cross protection for the bivalent vaccine, preventing 22.1% of other high risk HPV infections

Vaccine IV: 100% initial efficacy against HPV16/18, but efficacy wanes by 0.25% (absolute) every 6 months

Vaccine V: the nonavalent vaccine, providing 100% efficacy against HPV16/18 and preventing 63.6% of other high risk HPV infections

\*Screening scenarios provide screening ages, except 3/5 (6/10)-yearly represents screening every 3(6) years aged 25-49 years and every 5(10) years aged 50-64 years.

**Table S6: Number of screens, cancers, reduction in cancer incidence and incremental benefit (the reduction in cancer incidence per additional screen) for 100% screening coverage, for each combination of vaccination and screening scenario, from simulated datasets of 300,000 women with natural history parameters drawn from the distributions given in Figure 1 which had a lifetime risk of cervical cancer in the absence of vaccination or screening  $\geq 2.7\%$**

| Vaccine     | Screening scenario*             | Number of screens | Number of cancers (per cohort of 300,000) |              | Cancers prevented |              |        |         | Incremental benefit |              |
|-------------|---------------------------------|-------------------|-------------------------------------------|--------------|-------------------|--------------|--------|---------|---------------------|--------------|
|             |                                 |                   | Mean (sd)                                 | Mean         | 95% CR            | %            | 95% CR | Minimum | Maximum             | %            |
| None        | None                            |                   | 8251                                      | (8067, 8646) |                   |              |        |         |                     |              |
|             | <u>HPV primary testing</u>      |                   |                                           |              |                   |              |        |         |                     |              |
|             | 3/5-yearly                      | 12.6 (0.0)        | 656                                       | (583, 740)   | 92.0              | (91.0, 92.9) | 90.6   | 93.7    | 0.7                 | (0.6, 0.9)   |
|             | 6/10-yearly                     | 7.5 (0.0)         | 964                                       | (854, 1063)  | 88.3              | (87.2, 89.5) | 86.3   | 90.6    | 2.5                 | (2.1, 2.8)   |
|             | 30, 40, 50, 65                  | 4.4 (0.0)         | 1607                                      | (1451, 1735) | 80.5              | (79.0, 82.4) | 78.0   | 83.5    | 2.7                 | (1.9, 3.5)   |
|             | 30, 40, 55                      | 3.4 (0.0)         | 1828                                      | (1677, 1970) | 77.8              | (76.1, 79.6) | 74.6   | 81.2    | 23.0                | (22.3, 23.7) |
|             | <u>Cytology primary testing</u> |                   |                                           |              |                   |              |        |         |                     |              |
|             | 3/5-yearly                      | 12.0 (0.0)        | 954                                       | (857, 1057)  | 88.3              | (87.0, 89.3) | 86.7   | 90.1    | 1.4                 | (1.3, 1.6)   |
| 6/10-yearly | 7.0 (0.0)                       | 1538              | (1404, 1663)                              | 81.1         | (79.6, 82.7)      | 79.3         | 84.2   | 11.6    | (11.4, 11.8)        |              |
| I           | None                            |                   | 2386                                      | (1985, 2851) | 71.1              | (65.8, 75.6) | 64.7   | 76.5    |                     |              |
|             | 3/5-yearly                      | 12.3 (0.0)        | 210                                       | (162, 263)   | 97.5              | (96.8, 98.0) | 96.3   | 98.2    | 0.2                 | (0.1, 0.3)   |
|             | 6/10-yearly                     | 7.3 (0.0)         | 297                                       | (237, 371)   | 96.4              | (95.5, 97.1) | 94.9   | 97.3    | 0.7                 | (0.5, 0.9)   |
|             | 30, 40, 50, 65                  | 4.2 (0.0)         | 479                                       | (376, 590)   | 94.2              | (92.9, 95.4) | 92.4   | 95.7    | 1.0                 | (0.5, 1.6)   |
|             | 25, 35, 50, 65                  | 4.3 (0.0)         | 507                                       | (410, 625)   | 93.9              | (92.3, 95.0) | 91.6   | 95.3    | 0.6                 | (0.1, 1.2)   |
|             | 30, 40, 55                      | 3.2 (0.0)         | 563                                       | (460, 691)   | 93.2              | (91.5, 94.4) | 90.9   | 94.8    | 2.5                 | (1.8, 3.3)   |
|             | 30, 45, 60                      | 3.2 (0.0)         | 623                                       | (503, 759)   | 92.4              | (90.8, 93.8) | 90.0   | 94.3    | 1.8                 | (1.2, 2.5)   |
|             | 25, 45, 65                      | 3.2 (0.0)         | 795                                       | (650, 961)   | 90.4              | (88.3, 92.0) | 87.6   | 92.6    | -0.2                | (-1.0, 0.5)  |
|             | 30, 45                          | 2.1 (0.0)         | 775                                       | (631, 955)   | 90.6              | (88.4, 92.3) | 87.4   | 92.6    | 3.8                 | (2.8, 4.8)   |
|             | 30, 55                          | 2.2 (0.0)         | 860                                       | (711, 1039)  | 89.6              | (87.3, 91.3) | 86.3   | 91.8    | 2.9                 | (2.0, 3.9)   |
|             | 35                              | 1.1 (0.0)         | 1116                                      | (924, 1351)  | 86.5              | (83.6, 88.7) | 83.0   | 89.3    | 14.4                | (12.0, 17.2) |
|             | 40                              | 1.1 (0.0)         | 1164                                      | (977, 1408)  | 85.9              | (82.9, 88.2) | 82.4   | 88.6    | 14.0                | (11.5, 16.9) |
|             | 30                              | 1.1 (0.0)         | 1201                                      | (1000, 1448) | 85.4              | (82.4, 87.8) | 81.2   | 88.5    | 12.7                | (10.4, 15.2) |
|             | 45                              | 1.0 (0.0)         | 1351                                      | (1112, 1623) | 83.6              | (80.2, 86.4) | 79.9   | 87.1    | 12.2                | (10.0, 14.8) |
|             | None                            |                   | 2098                                      | (1725, 2517) | 74.6              | (69.9, 78.8) | 69.0   | 79.8    |                     |              |
|             | 3/5-yearly                      | 12.3 (0.0)        | 176                                       | (137, 223)   | 97.9              | (97.3, 98.4) | 97.1   | 98.4    | 0.2                 | (0.1, 0.3)   |
|             | 6/10-yearly                     | 7.2 (0.0)         | 256                                       | (203, 313)   | 96.9              | (96.3, 97.6) | 96.0   | 97.9    | 0.6                 | (0.4, 0.8)   |



|     |                |            |             |              |              |              |      |      |             |              |
|-----|----------------|------------|-------------|--------------|--------------|--------------|------|------|-------------|--------------|
| II  | 30, 40, 50, 65 | 4.1 (0.0)  | 411         | (330, 501)   | 95.0         | (94.0, 96.0) | 93.6 | 96.5 | 0.8         | (0.4, 1.2)   |
|     | 25, 35, 50, 65 | 4.3 (0.0)  | 434         | (348, 540)   | 94.7         | (93.6, 95.8) | 93.1 | 96.1 | 0.4         | (-0.1, 0.9)  |
|     | 30, 40, 55     | 3.1 (0.0)  | 472         | (377, 574)   | 94.3         | (93.0, 95.5) | 92.3 | 95.8 | 2.0         | (1.5, 2.7)   |
|     | 30, 45, 60     | 3.1 (0.0)  | 527         | (429, 644)   | 93.6         | (92.2, 94.9) | 91.4 | 95.1 | 1.4         | (0.9, 2.1)   |
|     | 25, 45, 65     | 3.1 (0.0)  | 695         | (567, 847)   | 91.6         | (89.8, 93.1) | 89.1 | 93.4 | -0.6        | (-1.2, 0.1)  |
|     | 30, 45         | 2.1 (0.0)  | 647         | (528, 797)   | 92.2         | (90.5, 93.7) | 89.7 | 94.1 | 3.5         | (2.6, 4.4)   |
|     | 30, 55         | 2.1 (0.0)  | 727         | (594, 905)   | 91.2         | (89.3, 92.8) | 88.2 | 93.4 | 2.6         | (1.8, 3.5)   |
|     | 35             | 1.1 (0.0)  | 957         | (787, 1167)  | 88.4         | (85.9, 90.5) | 85.6 | 91.0 | 13.0        | (10.6, 15.5) |
|     | 40             | 1.0 (0.0)  | 1000        | (826, 1217)  | 87.9         | (85.5, 90.1) | 85.1 | 90.5 | 12.7        | (10.4, 15.1) |
|     | 30             | 1.1 (0.0)  | 1023        | (844, 1262)  | 87.6         | (85.0, 89.8) | 84.0 | 90.5 | 11.7        | (9.6, 13.9)  |
| 45  | 1.0 (0.0)      | 1182       | (973, 1417) | 85.7         | (83.0, 88.1) | 82.4         | 88.7 | 10.8 | (8.9, 13.0) |              |
| III | None           |            | 1914        | (1590, 2272) | 76.8         | (72.5, 80.8) | 71.7 | 81.7 |             |              |
|     | 3/5-yearly     | 12.2 (0.0) | 174         | (130, 218)   | 97.9         | (97.4, 98.4) | 97.2 | 98.5 | 0.2         | (0.1, 0.2)   |
|     | 6/10-yearly    | 7.2 (0.0)  | 245         | (191, 302)   | 97.0         | (96.3, 97.7) | 96.1 | 97.8 | 0.6         | (0.4, 0.7)   |
|     | 30, 40, 50, 65 | 4.1 (0.0)  | 390         | (319, 466)   | 95.3         | (94.2, 96.1) | 94.0 | 96.4 | 0.7         | (0.3, 1.2)   |
|     | 25, 35, 50, 65 | 4.2 (0.0)  | 417         | (329, 508)   | 94.9         | (93.8, 96.0) | 93.4 | 96.2 | 0.4         | (-0.1, 1.0)  |
|     | 30, 40, 55     | 3.2 (0.0)  | 451         | (371, 548)   | 94.5         | (93.3, 95.5) | 93.1 | 95.7 | 2.1         | (1.4, 2.8)   |
|     | 30, 45, 60     | 3.1 (0.0)  | 504         | (411, 602)   | 93.9         | (92.7, 95.0) | 92.4 | 95.4 | 1.5         | (0.9, 2.1)   |
|     | 25, 45, 65     | 3.1 (0.0)  | 661         | (534, 796)   | 92.0         | (90.4, 93.4) | 90.0 | 94.0 | -0.4        | (-1.0, 0.2)  |
|     | 30, 45         | 2.1 (0.0)  | 631         | (515, 765)   | 92.4         | (90.7, 93.8) | 90.1 | 94.1 | 3.1         | (2.4, 3.9)   |
|     | 30, 55         | 2.1 (0.0)  | 697         | (577, 842)   | 91.6         | (89.8, 93.0) | 89.4 | 93.5 | 2.3         | (1.6, 3.1)   |
|     | 35             | 1.1 (0.0)  | 900         | (758, 1078)  | 89.1         | (86.9, 90.8) | 86.2 | 91.3 | 11.6        | (9.4, 14.1)  |
|     | 40             | 1.0 (0.0)  | 926         | (764, 1112)  | 88.8         | (86.7, 90.7) | 85.8 | 91.5 | 11.5        | (9.3, 14.0)  |
|     | 30             | 1.1 (0.0)  | 976         | (804, 1173)  | 88.2         | (85.9, 90.2) | 85.2 | 91.0 | 10.2        | (8.4, 12.3)  |
| 45  | 1.0 (0.0)      | 1087       | (904, 1302) | 86.8         | (84.5, 89.1) | 83.7         | 89.5 | 9.8  | (7.9, 11.8) |              |
| IV  | None           |            | 2746        | (2326, 3206) | 66.7         | (61.6, 71.5) | 60.2 | 72.3 |             |              |
|     | 3/5-yearly     | 12.3 (0.0) | 244         | (197, 297)   | 97.0         | (96.4, 97.6) | 96.0 | 97.9 | 0.2         | (0.2, 0.3)   |
|     | 6/10-yearly    | 7.3 (0.0)  | 344         | (278, 420)   | 95.8         | (94.9, 96.6) | 94.4 | 97.0 | 0.8         | (0.6, 1.0)   |
|     | 30, 40, 50, 65 | 4.2 (0.0)  | 547         | (458, 661)   | 93.4         | (92.0, 94.4) | 91.5 | 95.0 | 1.3         | (0.8, 1.8)   |
|     | 25, 35, 50, 65 | 4.3 (0.0)  | 590         | (493, 694)   | 92.8         | (91.6, 94.0) | 90.9 | 94.2 | 0.7         | (0.2, 1.2)   |
|     | 30, 40, 55     | 3.2 (0.0)  | 650         | (540, 770)   | 92.1         | (90.8, 93.4) | 89.6 | 93.7 | 3.1         | (2.4, 3.9)   |
|     | 30, 45, 60     | 3.2 (0.0)  | 717         | (601, 850)   | 91.3         | (89.9, 92.7) | 89.3 | 93.2 | 2.4         | (1.7, 3.1)   |
|     | 25, 45, 65     | 3.2 (0.0)  | 931         | (789, 1105)  | 88.7         | (86.9, 90.4) | 85.7 | 90.8 | -0.2        | (-0.9, 0.5)  |

|   |                |            |      |              |      |              |      |      |      |              |
|---|----------------|------------|------|--------------|------|--------------|------|------|------|--------------|
|   | 30, 45         | 2.2 (0.0)  | 915  | (763, 1070)  | 88.9 | (87.1, 90.7) | 85.6 | 91.1 | 4.4  | (3.4, 5.4)   |
|   | 30, 55         | 2.2 (0.0)  | 987  | (834, 1160)  | 88.0 | (86.0, 89.8) | 84.6 | 90.4 | 3.6  | (2.6, 4.5)   |
|   | 35             | 1.1 (0.0)  | 1311 | (1117, 1552) | 84.1 | (81.4, 86.3) | 80.6 | 86.9 | 16.2 | (13.6, 19.0) |
|   | 40             | 1.1 (0.0)  | 1359 | (1160, 1585) | 83.5 | (81.0, 85.9) | 80.1 | 86.4 | 15.9 | (13.2, 18.7) |
|   | 30             | 1.1 (0.0)  | 1410 | (1202, 1661) | 82.9 | (80.1, 85.4) | 78.7 | 86.1 | 14.1 | (11.7, 16.4) |
|   | 45             | 1.0 (0.0)  | 1570 | (1335, 1823) | 81.0 | (78.1, 83.8) | 77.0 | 84.1 | 13.8 | (11.5, 16.4) |
| V | None           |            | 954  | (779, 1156)  | 88.4 | (86.0, 90.5) | 85.2 | 90.6 |      |              |
|   | 3/5-yearly     | 12.1 (0.0) | 85   | (60, 111)    | 99.0 | (98.7, 99.3) | 98.5 | 99.3 | 0.1  | (0.0, 0.1)   |
|   | 6/10-yearly    | 7.1 (0.0)  | 120  | (89, 157)    | 98.5 | (98.1, 98.9) | 98.0 | 99.0 | 0.3  | (0.2, 0.4)   |
|   | 30, 40, 50, 65 | 4.1 (0.0)  | 196  | (152, 247)   | 97.6 | (97.0, 98.2) | 96.9 | 98.4 | 0.3  | (0.0, 0.6)   |
|   | 25, 35, 50, 65 | 4.1 (0.0)  | 205  | (158, 262)   | 97.5 | (96.9, 98.1) | 96.6 | 98.3 | 0.2  | (-0.1, 0.5)  |
|   | 30, 40, 55     | 3.1 (0.0)  | 223  | (172, 282)   | 97.3 | (96.6, 97.9) | 96.4 | 98.0 | 1.0  | (0.7, 1.5)   |
|   | 30, 45, 60     | 3.1 (0.0)  | 252  | (193, 317)   | 96.9 | (96.2, 97.7) | 95.8 | 97.9 | 0.7  | (0.4, 1.0)   |
|   | 25, 45, 65     | 3.1 (0.0)  | 322  | (252, 405)   | 96.1 | (95.1, 96.9) | 94.6 | 97.1 | -0.1 | (-0.5, 0.2)  |
|   | 30, 45         | 2.1 (0.0)  | 310  | (247, 383)   | 96.2 | (95.4, 97.0) | 95.2 | 97.2 | 1.5  | (1.1, 2.1)   |
|   | 30, 55         | 2.1 (0.0)  | 345  | (268, 429)   | 95.8 | (94.8, 96.7) | 94.5 | 96.9 | 1.1  | (0.7, 1.7)   |
|   | 35             | 1.0 (0.0)  | 441  | (351, 549)   | 94.7 | (93.4, 95.7) | 93.0 | 96.1 | 6.1  | (4.9, 7.4)   |
|   | 40             | 1.0 (0.0)  | 460  | (371, 567)   | 94.4 | (93.1, 95.5) | 92.9 | 95.7 | 5.9  | (4.7, 7.2)   |
|   | 30             | 1.1 (0.0)  | 478  | (381, 595)   | 94.2 | (92.9, 95.3) | 92.6 | 95.6 | 5.5  | (4.4, 6.7)   |
|   | 45             | 1.0 (0.0)  | 544  | (443, 663)   | 93.4 | (92.1, 94.6) | 91.6 | 94.9 | 4.9  | (3.9, 6.1)   |

Central Range, the 2.5th and 97.5th percentiles

Vaccine I: 100% efficacy against HPV16/18, no cross protection or waning efficacy

Vaccine II: 100% efficacy against HPV16/18, cross protection for the quadrivalent vaccine, preventing 14.7% of other high risk HPV infections

Vaccine III: 100% efficacy against HPV16/18, cross protection for the bivalent vaccine, preventing 22.1% of other high risk HPV infections

Vaccine IV: 100% initial efficacy against HPV16/18, but efficacy wanes by 0.25% (absolute) every 6 months

Vaccine V: the nonavalent vaccine, providing 100% efficacy against HPV16/18 and preventing 63.6% of other high risk HPV infections

\*Screening scenarios provide screening ages, except 3/5 (6/10)-yearly represents screening every 3(6) years aged 25-49 years and every 5(10) years aged 50-64 years.
